1 Soil depth gradients in microbial growth kinetics under deeply- vs. shallow-rooted plants

2 Kyungjin Min<sup>ab</sup>, Eric Slessarev<sup>c</sup>, Megan Kan<sup>c</sup>, Karis McFarlane<sup>c</sup>, Erik Oerter<sup>c</sup>, Jennifer Pett-Ridge<sup>c</sup>, Erin

3 Nuccio<sup>c</sup>, Asmeret Asefaw Berhe<sup>a</sup>

4 <sup>a</sup> Department of Life and Environmental Sciences, University of California, Merced, CA 95343

5 <sup>b</sup> Center for Anthropocene Studies, Korea Advanced Institute of Science and Technology, Daejeon, South

6 Korea 34141

7 <sup>c</sup> Physical and Life Sciences Directorate, Lawrence Livermore National Laboratory, Livermore, CA 94550

8

9 **ABSTRACT**

10 Climate-smart land management practices that replace shallow-rooted annual crop systems with  
11 deeply-rooted perennial plants can contribute to soil carbon sequestration. However, deep soil carbon  
12 accrual may be influenced by active microbial biomass and their capacity to assimilate fresh carbon at  
13 depth. Incorporating active microbial biomass, dormancy and growth in microbially-explicit models can  
14 improve our ability to predict soil's capacity to store carbon. But, so far, the microbial parameters that  
15 are needed for such modeling are poorly constrained, especially in deep soil layers. Here, we  
16 investigated whether a change in crop rooting depth affects microbial growth kinetics in deep soils  
17 compared to surface soils. We used a lab incubation experiment and growth kinetics model to estimate  
18 how microbial parameters vary along 240 cm of soil depth in profiles under shallow- (soy) and deeply-  
19 rooted plants (switchgrass) 11 years after plant cover conversion. We also assessed resource origin and  
20 availability (total organic carbon,  $^{14}\text{C}$ , dissolved organic carbon, specific UV absorbance, total nitrogen,  
21 total dissolved nitrogen) along the soil profiles to examine associations between soil chemical and  
22 biological parameters. Even though root biomass was higher and rooting depth was deeper under  
23 switchgrass than soy, resource availability and microbial growth parameters were generally similar  
24 between vegetation types. Instead, depth significantly influenced soil chemical and biological  
25 parameters. For example, resource availability, and total and relative active microbial biomass  
26 decreased with soil depth. Decreases in the relative active microbial biomass coincided with increased  
27 lag time (response time to external carbon inputs) along the soil profiles. Even at a depth of 210-240 cm,  
28 microbial communities were activated to grow by added resources within a day. Maximum specific  
29 growth rate decreased to a depth of 90 cm and then remained consistent in deeper layers. Our findings  
30 show that > 10 years of vegetation and rooting depth changes may not be long enough to alter microbial  
31 growth parameters, and suggest that at least a portion of the microbial community in deep soils can

32 grow rapidly in response to added resources. Our study determined microbial growth parameters that  
33 can be used in microbially-explicit models to simulate carbon dynamics in deep soil layers.

34 **KEYWORD:**

35 deep soil, microbial growth, active biomass, switchgrass, resource availability, microbial dormancy, <sup>14</sup>C,  
36 dissolved organic carbon

37

38

## 39 INTRODUCTION

40 Soil contains the largest carbon (C) pool in terrestrial ecosystems (IPCC, 2013; Jobbágy and Jackson,  
41 2000). Accrual of organic C along soil depth gradients can contribute to climate change mitigation  
42 through sequestration of atmospheric carbon dioxide (Paustian et al., 2016). However, most soil C  
43 dynamics research so far has focused on the top 30 cm of soil, where soil C concentrations are highest  
44 (Jobbágy and Jackson, 2000; Kögel-Knabner et al., 2008). Recent studies highlight that surface soil (< 30  
45 cm) and deep soil (> 30 cm) C pools respond differently to changes in environmental conditions (Berhe  
46 et al., 2008; Fierer et al., 2003a; Jia et al., 2019; Min et al., 2020; Pries et al., 2017). At the surface,  
47 variation in abiotic factors such as temperature and moisture can influence microbial transformation of  
48 soil organic C. However, in deeper soil layers, relatively constant environmental conditions, increased  
49 mineral interactions, and lower microbial biomass, combined with distinct microbial community  
50 composition, may alter the capacity for microbial C transformation relative to the surface (Rumpel et al.,  
51 2012; Rumpel and Kögel-Knabner, 2011). Given that most soil C is stored in deep soils (Jobbágy and  
52 Jackson, 2000), we must establish a better understanding of how microbially-driven C dynamics vary  
53 along soil depth gradients.

54

55 Microorganisms modify the amount and chemical composition of soil organic matter via decomposition,  
56 respiration, growth, and death. Due to the critical roles microbes play in soil C dynamics, several  
57 biogeochemical models have recently incorporated microbial parameters (Allison et al., 2010; Salazar-  
58 Villegas et al., 2016; Wang et al., 2015; Wieder et al., 2015, 2013). Active microbial biomass and  
59 microbial growth rates are both key parameters in microbially-explicit models (He et al., 2015; Zha and  
60 Zhuang, 2020), but are poorly quantified because of the technical difficulty of direct quantification  
61 (Geyer et al., 2016). Most empirical measurements of microbial biomass reflect total biomass, using

62 analyses made with chloroform fumigation (Anderson and Domsch, 1978; Vance et al., 1987),  
63 phospholipid fatty acid (Kao-kniffin and Balsler, 2008; Kohl et al., 2015) or ATP (Contin et al., 2001;  
64 Martens, 1995) approaches. However, since total microbial biomass comprises both active and dormant  
65 biomass, and active microbial biomass is more relevant to biogeochemical cycles (Couradeau et al.,  
66 2019; Geyer et al., 2016; Salazar-Villegas et al., 2016; Singer et al., 2017), using total microbial biomass  
67 in models may be inadequate when projecting soil C dynamics. Microbial growth and dormancy can be  
68 estimated from growth kinetics models (Mitchell et al., 2004; Panikov and Sizova, 1996), as well as  
69 quantitative stable isotope probing (Koch et al., 2018; Pett-Ridge and Firestone, 2017; Schwartz et al.,  
70 2016), nucleotide analog tagging (Allison et al., 2008; Hanson et al., 2008), and amino acid-tagging  
71 approaches (Couradeau et al., 2019; Hatzenpichler et al., 2014).

72  
73 In 1995, Panikov (1995) developed a model that parses microbial respiration sources into growth vs.  
74 non-growth related respiration and estimates growth-related parameters (e.g., active vs. dormant  
75 microbial biomass, the lag phase before exponential growth, and maximum specific growth rate; See  
76 Methods). This approach is useful because it requires readily measurable microbial respiration as an  
77 input, and the estimated microbial parameters can be directly used in microbially-explicit models. Using  
78 the Panikov model, Blagodatskaya et al. (2014) demonstrated that rhizosphere microbes exhibit a  
79 shorter lag time than non-rhizosphere microbes, due to their higher proportion of active biomass and  
80 associated lower dormancy. Also, Salazar-Villegas et al. (2016) demonstrated that neither warming nor  
81 wetting treatments alter maximum specific growth rates of soil microbial communities.

82  
83 Changes in resource availability with soil depth may influence microbial growth parameters. The  
84 amounts of organic C, nitrogen (N), and other resources are often higher at the soil surface where inputs  
85 from plant litter and root exudates are concentrated (Jobbágy et al., 2001; Rumpel and Kögel-Knabner,

86 2011). In contrast, deeper layers receive limited direct plant inputs; typically, only dissolved organic  
87 matter that moves downward through mass flow or diffusion. In addition, mineral-organic matter  
88 associations in deeper layers can reduce microbial access to resources (Schmidt et al., 2011). Some  
89 studies suggest that soil microorganisms grow faster when resources are more abundant. For example,  
90 Blagodatskaya et al. (2010) demonstrated that more C inputs into soils under elevated CO<sub>2</sub> increased  
91 microbial maximum specific growth rate.

92  
93 Similarly, rhizosphere microbes exhibited greater maximum specific growth rates and shorter lag times  
94 than bulk soil microbes (Blagodatskaya et al., 2014). Recent research suggests that these rapid growth  
95 responses to resource additions may be driven by traits related to microbial evolutionary history,  
96 taxonomy, 16S rRNA gene copy number or genome size (Li et al., 2019; Morrissey et al., 2019). Given the  
97 expected decreases in resource availability along soil depth profiles, it is plausible that microbial  
98 dormancy increases and the capacity for a rapid growth response declines with soil depth. It is also  
99 possible that microbial lag time increases with soil depth because microbes in deeper layers may be  
100 more likely to use strategies such as sporulation, and some of the abundant taxa in deep soils have been  
101 shown to decrease in relative abundance after soil fertilization (Brewer et al., 2019). Yet, it is unclear  
102 how the direction and magnitude of microbial growth parameters vary with soil depth profiles.

103  
104 Improved understanding of depth-specific microbial growth kinetics is key for climate-smart land  
105 management practices that consider implementation of improved root phenotypes and/or replacement  
106 of annual crops with deeply rooted perennials (Paustian et al., 2016). One model deeply rooted species  
107 that is being considered in these efforts is switchgrass, a perennial grass native to North America, with a  
108 deep rooting system that extends up to 3 m (Liebig et al., 2005; Wright, 2007). Conversion from annual  
109 crops to switchgrass can significantly increase deep soil C stocks (Slessarev et al., 2020b). Deeply rooted

110 plant contributions to increased soil C storage are likely tied to changes in the distribution of  
111 rhizodeposits, water flow through the soil profile, and the types of microbial communities that thrive in  
112 the rhizosphere. For example, in switchgrass fields, enhanced production of extracellular polymeric  
113 substances and higher soil aggregate formation have been measured relative to annual crops (Sher et  
114 al., 2020), and linked to increased soil C storage with depth (Blanco-Canqui et al., 2005; McGowan et al.,  
115 2019; Sher et al., 2020). Also, switchgrass roots increased microbial OTU (operational taxonomic unit)  
116 richness along 60 cm of the soil profile (He et al., 2017). To our knowledge, no data currently exists on  
117 how the conversion of an annual crop to a deep-rooted perennial crop, such as switchgrass, impacts  
118 microbial growth and growth-related parameters (e.g., dormancy, active biomass) in deeper soil layers.  
119  
120 Here, we investigate microbial growth parameters along soil depth profiles under deeply- (switchgrass)  
121 and shallow-(soy) rooted plants. We collected soils under switchgrass and soy plots (n=3, each) from  
122 adjacent, paired field locations at soil sampling depths ranging from 0 to 240 cm. We incubated these  
123 soils with yeast extract as an added C and energy source, and monitored CO<sub>2</sub> efflux to parameterize a  
124 growth kinetics model according to a previously described approach (Blagodatsky et al., 2006; Wutzler  
125 et al., 2012). By fitting a growth kinetics model to the CO<sub>2</sub> data, we estimated total and active microbial  
126 biomass, maximum specific growth rate, and lag time. In addition, we quantified resource availability  
127 prior to the yeast extract addition to explore the interaction of depth and resource availability on  
128 microbial parameters. We hypothesized that (1) increasing depth would decrease maximum specific  
129 growth rate, due to decreasing resource availability (available C, N), (2) active biomass would be highest  
130 in surface soil layers while lag time would be greatest in deep soil layers, due to reductions in resource  
131 availability, and (3) microbial growth parameters would be less affected by depth under switchgrass  
132 than soy, because greater rooting depth results in more abundant resources inputs at depth.

133

134

135 **METHODS**

136 Study site and soil sampling

137 The study site is located near Bristol, South Dakota (45°16'N, 97°50'W), where switchgrass (*Panicum*  
138 *virgatum* L.; cultivar, Sunburst) has been growing since 2008 (Sekaran et al., 2019). Before switchgrass  
139 was cultivated, the site was used for soy. The mean annual temperature is 6.3°C, mean annual rainfall is  
140 638 mm, and mean annual snowfall is 1092 mm at the nearest weather station in Webster, South  
141 Dakota (~32 km away, [https://www.usclimatedata.com/climate/webster/south-dakota/united-](https://www.usclimatedata.com/climate/webster/south-dakota/united-states/usss0368/2018/1)  
142 [states/usss0368/2018/1](https://www.usclimatedata.com/climate/webster/south-dakota/united-states/usss0368/2018/1)). The study site is part of a long-term nitrogen (N) addition experiment (0, 56,  
143 and 112 kg urea-N ha<sup>-1</sup> yr<sup>-1</sup> since 2008), however, only control sites (0 kg N) were used for this  
144 experiment. The soils are classified as Fine-loamy, mixed, superactive, frigid Calcic Hapludolls (Barnes  
145 series, USDA Soil Taxonomy) and Fine-loamy, mixed, superactive, frigid Typic Calcudolls (Buse series,  
146 USDA Soil Taxonomy). The parent material is glacial till dominated by fine-grained sedimentary rocks  
147 deposited in the upper Pleistocene (Mankato substage, approximately 14 ka before present (Flint,  
148 1955)). Each treatment plot is 21.3 m x 365.8 m with a 2-20% slope.

149 In July 2019, we collected a 240 cm deep soil core under switchgrass from each of three non-fertilized  
150 plots on a crest landscape position (n=3) using a Geoprobe® 54LT direct push machine (Salina, Kansas,  
151 USA) combined with a MC7 system (diameter: 7.62 cm). For comparison, we also collected three 240 cm  
152 of deep soil cores in a soy field adjacent to the switchgrass plots (n=3). Since 2008, this field has been  
153 primarily used to grow soy and intermittently cropped with other annuals (spring wheat or corn or  
154 maintained as pasture (USDA NASS 2020; <https://nassgeodata.gmu.edu/CropScape/>)). After extraction,  
155 soil cores were immediately divided into nine sections using a hybrid fixed depth and soil horizon  
156 method, i.e., when there was a clear separation between soil horizons by color or texture, we divided



157 sections using a generic horizon approach. Otherwise, we divided soil cores into 20 cm increments for  
158 the top 60 cm soil and 30 cm increments for depths below 60 cm. Hereafter, we refer to the soil depth  
159 sections as 0-20, 20-40, 40-60, 60-90, 90-120, 120-150, 150-180, 180-210, and 210-240 cm for simplicity  
160 of visual representation. After soil cores were subsectioned, we removed rocks and roots manually in  
161 the field, shipped the samples to the University of California-Merced in a cooler, and stored them at 4°C.  
162 Within a week of arrival, soil samples were processed to determine soil physical, chemical, and microbial  
163 properties. In the lab, more roots were hand-picked if necessary. Roots collected from soil cores were  
164 dried and weighed to quantify root distribution along soil depth profiles.

165

#### 166 Soil physicochemical properties

167 Soil pH was determined in water (1:5, fresh soil weight:water volume) using a Mettler Toledo pH meter.  
168 We extracted dissolved organic C (DOC) by mixing 6 g of fresh soil with 30 mL of 0.5 M K<sub>2</sub>SO<sub>4</sub> and shaking  
169 the soil solution for 4 h. The soil solution was then centrifugated at 2,000 rpm for 5 min and the  
170 supernatant was filtered through a 0.45 µm membrane filter (PALL, Port Washington, NY, USA). The  
171 filtrate was stored at -20°C until analysis. The DOC concentration and dissolved N in K<sub>2</sub>SO<sub>4</sub> extracts were  
172 determined using a VCSH Total OC Analyzer (SHIMADZU, Kyoto, Japan) after thawing in the  
173 Environmental Analytical Lab at the University of California-Merced. To estimate the easiness of  
174 microbial utilization, we quantified Specific UV Absorbance at 254 nm (SUVA) on K<sub>2</sub>SO<sub>4</sub> extracts, using a  
175 UV-VIS spectrophotometer (Evolution 300, Thermo Scientific, Massachusetts, USA). Higher SUVA values  
176 indicate a higher relative abundance of aromatic compounds in DOC extracts (Weishaar et al., 2003) and  
177 less available form of DOC to microbes.

178 Total C and N were quantified on dried and ground soils at the Oregon State University Crop and Soil  
179 Science Central Analytical laboratory. Because soils in both vegetation types were alkaline with pH

180 between 8.0 and 9.3 (S1), we treated soils with 1M HCl to remove carbonates before determining total  
181 OC concentrations. Inorganic C was quantified at Lawrence Livermore National Laboratory by treating  
182 finely-ground subsamples of each sample with 1 M phosphoric acid in a sealed jar and measuring CO<sub>2</sub>  
183 evolved using a LI-850 infrared gas analyzer (Robertson et al., 1999) for 24 h. Total OC and <sup>13</sup>C were  
184 quantified on acid-treated soils (treatment with 1 M HCl) at the Integrative Biology Center for Stable  
185 Isotope Biogeochemistry Lab at the University of California-Berkeley.

186 We assessed radiocarbon values on soils from 0 cm to 150 cm only. Radiocarbon values were measured  
187 on the NEC 1.0 MV Tandem Accelerator Mass Spectrometer (AMS) or the FN Tandem Van de Graaff AMS  
188 at the Center for Accelerator Mass Spectrometry (CAMS) at Lawrence Livermore National Laboratory.  
189 Prior to measurement, acid-treated soils were prepared for <sup>14</sup>C measurement by sealed-tube  
190 combustion to CO<sub>2</sub> in the presence of Ag and CuO and reduced onto Fe powder in the presence of H<sub>2</sub>  
191 (Vogel et al., 1984). The <sup>14</sup>C content of each sample was reported in Δ<sup>14</sup>C notation, corrected for mass-  
192 dependent fractionation with measured δ<sup>13</sup>C values, and then corrected to the year of measurement for  
193 <sup>14</sup>C decay since 1950 (Stuiver and Polach, 1977).

194

#### 195 Soil incubation and CO<sub>2</sub> measurement

196 For soil incubations, 20 g of fresh soil was weighed into a polypropylene incubation jar (McMaster-Carr,  
197 473 mL) and pre-incubated at 22°C overnight (108 jars = 2 vegetation types \* 9 depths \* 3 replicate  
198 cores \* 2 amendment treatments). For treatment jars, we added 40 mg of powder yeast extract g<sup>-1</sup> dry  
199 soil as a C and nutrient source (VWR). We chose yeast extract over glucose to provide more varied forms  
200 of C and thus stimulate more diverse microorganisms (Fierer et al., 2003b; Slessarev et al., 2020a). A  
201 preliminary experiment confirmed that the amount of yeast extract added to the soil was enough to  
202 avoid limiting growth during ~10 h of exponential growth phase. After the yeast extract was added, we

203 adjusted the soil water content to 60% of water holding capacity (initial gravimetric water content was  
204  $18.6 \pm 3.7\%$ ) and stirred the soils for 30 s. For control jars, only water was added to soils without yeast  
205 extract. The jars were closed with a lid equipped with a non-dispersive infrared CO<sub>2</sub> sensor (CM0126-FS,  
206 1% CO<sub>2</sub> sensor, CO<sub>2</sub> meter) (Harmon et al., 2015). We monitored CO<sub>2</sub> concentrations for 10 min every 30  
207 to 60 min during the incubation (24~30 h), computed the slope of CO<sub>2</sub> concentration over time, and  
208 quantified the microbial respiration rate ( $\mu\text{g C-CO}_2 \text{ g}^{-1} \text{ dry soil h}^{-1}$ ).

209

### 210 Microbial growth kinetics

211 We measured microbial growth kinetics using the Panikov model approach, which makes three  
212 assumptions (Panikov, 1995; Panikov and Sizova, 1996): First, microbes are not limited by resources (C,  
213 water, and nutrients) during incubation. Second, microbial parameters that are estimated from the  
214 model refer to those for the initial microbial community, not for the final microbial community after the  
215 activation by resources. Three, microbial parameters estimated from the model refer to those from a  
216 whole microbial community, undifferentiated among microbial taxa. Under such conditions, microbial  
217 respiration follows the equation:

$$218 \quad v(t) = A + B \cdot \exp(\mu_{max} \cdot t)$$

219 Where  $v$  is total microbial respiration rate ( $\mu\text{g C-CO}_2 \text{ g}^{-1} \text{ dry soil h}^{-1}$ ) at time  $t$ ,  $A$  is non-growth respiration  
220 of the initial microbial community ( $\mu\text{g C-CO}_2 \text{ g}^{-1} \text{ dry soil h}^{-1}$ ),  $B$  is growth-based respiration of the initial  
221 microbial community ( $\mu\text{g C-CO}_2 \text{ g}^{-1} \text{ dry soil h}^{-1}$ ),  $\mu_{max}$  is the maximum specific growth rate of the initial  
222 microbial community ( $\text{h}^{-1}$ ), and  $t$  is the time elapsed since the C and nutrients addition (h). Fitting of this  
223 growth kinetics model to our CO<sub>2</sub> data was restricted to the initial exponential growth phase (inflection  
224 point) to accurately capture unlimited growth and maximize the goodness of fit  $r^2$  (Wutzler et al., 2012).

225 Physiological status of the initial microbial biomass (relative active biomass) was calculated as below.

226 
$$r_0 = \frac{B(1-\lambda)}{A+B(1-\lambda)}$$

227 Where  $r_0$  is relative active biomass of the initial microbial community (unitless) and  $\lambda$  is the ratio of  
228 maximum specific rate of growth-related substrate uptake over maximum specific rate of total substrate  
229 uptake under unlimited growth. Trutko et al. (1984) demonstrated that the value of  $\lambda$  varied between  
230 0.8-0.9 over 100 microbial species. As previous studies exploring microbial growth kinetics have  
231 employed  $\lambda=0.9$  (Blagodatskaya et al., 2014; Blagodatsky et al., 2006; Panikov and Sizova, 1996), we  
232 also used 0.9 for this study. The value of  $r_0$  varies between 0 and 1, with 0 when all microbes are  
233 dormant and 1 when all microbes actively grow and divide cells.

234 Total initial microbial biomass was calculated as per the following:

235 
$$x_0 = \frac{B \cdot \lambda \cdot Y_{CO_2}}{r_0 \cdot \mu_{max}}$$

236 Where  $x_0$  is the total initial microbial biomass ( $\mu\text{g C-biomass g}^{-1}$  dry soil), and  $Y_{CO_2}$  is biomass yield per  
237 unit  $CO_2$  respired. We acknowledge that  $Y_{CO_2}$  can vary with changes in environmental conditions such as  
238 temperature and C availability (Lehmeier et al., 2016; Manzoni et al., 2012; Min et al., 2016). However,  
239 during the experiment, microbes were allowed to grow under unlimited C and at a constant  
240 temperature of 22°C. Thus, we assumed that  $Y_{CO_2}$  is constant at 1.5, which corresponds to a commonly  
241 observed microbial C use efficiency of 0.6 (Keiblinger et al., 2010; Manzoni et al., 2012; Min et al., 2016).

242 We define lag phase ( $t_{lag}$ ) as the period when non-growth respiration is equal to or less than growth-  
243 related respiration.

244 
$$A = B \cdot \exp(\mu_{max} \cdot t_{lag})$$

245 
$$t_{lag} = \frac{\ln(\frac{A}{B})}{\mu_{max}}$$

246

247 We assume the longer the lag time is, the higher degree of microbial dormancy. Details about the  
248 derivatization and calculation of these growth kinetics equations are provided in previous studies  
249 (Blagodatsky et al., 2006; Panikov, 1995; Panikov and Sizova, 1996).

250

## 251 Statistics

252 Data are presented as mean  $\pm$  standard error, where  $n = 3$  from replicate cores across soil depth profiles  
253 and vegetation types. We fit the Panikov model to the microbial respiration data and estimated  
254 microbial growth parameters using a nonlinear least-squares approach (*nls* function in R, R Core Team  
255 3.6.3). The effects of vegetation and depth on microbial growth parameters, resource availability, and  
256 root biomass were tested using a linear mixed-effects model, with vegetation and depth as explanatory  
257 variables and soil core as a random variable (*nlme* package, *lme* (linear mixed effects) function,  
258 restricted maximum likelihood method). Depth was treated as continuous. When there was a significant  
259 interaction of vegetation type and depth, we used Tukey *posthoc* tests to compare soy and switchgrass  
260 values at each depth (*multcomp* package, *glht* (general linear hypotheses) function, Tukey method). All  
261 significance was tested at  $\alpha = 0.05$ .

262

263 **RESULTS**

264 Depth profiles of root biomass and resource availability

265 Increasing depth decreased root biomass for both vegetation types ( $p = 0.002$ ; Fig. 1). No root was  
266 detected below 60 cm under soy, while we found roots under switchgrass till 150-180 cm.

267 At a given depth interval, switchgrass produced more roots than soy along soil depth profiles ( $p = 0.004$ ;  
268 Fig.1).

269  
270 Overall, resource availability declined with soil depth but did not differ between vegetation types (Fig.  
271 2). For example, total OC was highest at 0-20 cm for both vegetation types, decreased between 0-20 cm  
272 and 40-60 cm, then kept similar below (Fig. 2a). We observed greater total OC concentrations under soy  
273 than switchgrass at 0-20 cm. Soil depth decreased  $^{14}\text{C}$  values, but vegetation types had little influence on  
274 the  $^{14}\text{C}$  values (Fig. 2b). Below 90 cm,  $^{14}\text{C}$  values approached -1000 per mille, which suggests a mean OC  
275 age greater than the geologic substrate's age (Upper Pleistocene  $\sim 14$  ka (Martin et al., 2004)). This likely  
276 reflects contributions of fossil OC from the Pierre Shale, a major constituent of glacial till in eastern  
277 South Dakota (Flint, 1955), and the underlying bedrock in the region (Tomhave and Schulz, 2004) with  
278 an OC content up to several percent (Gautier, 1986; Kennedy et al., 2002).

279  
280 DOC significantly decreased with depth and did not vary between vegetation types (Fig. 2c). At 0-20 cm,  
281 the average DOC concentration across vegetation types was  $113.2 \mu\text{g g}^{-1}$ , twice that at 20-40 cm ( $p <$   
282  $0.001$ ). Below 60 cm, the DOC concentration was relatively similar across depths. Depth, but not  
283 vegetation type, significantly influenced aromaticity of DOC, measured as SUVA (Fig. 2d).

284 Both total N and dissolved N were significantly influenced by the interaction of depth and vegetation ( $p$   
285  $< 0.001$  and  $0.012$ , respectively; Fig. 2e,f). At 20-40 cm and 40-60 cm, total N content was higher under

286 soy than under switchgrass ( $p = 0.03$  and  $0.07$ , respectively). In contrast, dissolved N was similar  
287 between soy and switchgrass at 0-20 cm, but was significantly higher under soy at depths below 20 cm.

288

### 289 Microbial respiration

290 Basal respiration, before adding yeast extract, was similar across vegetation and depth (S2). When the  
291 data was pooled, the average rate of basal respiration was  $0.45 \pm 0.02 \mu\text{g C-CO}_2 \text{ g}^{-1} \text{ dry soil h}^{-1}$ . We  
292 observed distinct patterns in microbial respiration after the addition of water (control) versus water plus  
293 yeast extract (treatment) to soils (Fig. 3). Water addition did not alter microbial respiration (Fig. 3a),  
294 whereas water plus yeast extract immediately enhanced microbial respiration more than ten times (Fig.  
295 3b). Then, in the following 30 hours, the yeast extract treatment's respiration rate became relatively  
296 stable, increased exponentially, then dropped when all the available resources were consumed.

297

### 298 Growth parameters

299 We fit the Panikov model to the microbial respiration data to compare microbial growth parameters  
300 across depth and vegetation (Fig. 4). Similar to the patterns in resource availability across vegetation  
301 and soil depth, we observed a significant depth effect on microbial parameters (except for maximum  
302 specific growth rate), but vegetation had little effect on microbial growth kinetics (Fig. 5).

303

304 Total microbial biomass was significantly influenced by depth, but not by vegetation or vegetation and  
305 depth interaction (Fig. 5a). When we pooled the data across vegetation, total microbial biomass was  
306  $131.8 \pm 9.6 \mu\text{g C g}^{-1} \text{ dry soil}$  at 0-20 cm and decreased by 77% to  $30.5 \pm 3.0 \mu\text{g C g}^{-1} \text{ dry soil}$  at 210-240  
307 cm.

308

309 Overall, the relative active biomass decreased along soil depth profiles, with a 143 times of reduction  
310 from the surface to a depth of 210-240 cm (Fig. 5b). We found that at 40-60 cm, where there was no  
311 difference in the total microbial biomass between soy and switchgrass (Fig. 5a), the relative active  
312 biomass was two times greater under soy than under switchgrass ( $p = 0.04$ ; Fig. 5b).

313  
314 Lag time increased with soil depth profiles (Fig. 5c) and decreased with relative active biomass (S3). The  
315 interaction of depth and vegetation significantly influenced lag time (Fig. 5c). At 40-60 cm, the average  
316 lag time under soy was 6.1 h, 27% faster than microbes under switchgrass ( $p = 0.024$ ). At 0-20 cm, the  
317 lag time was marginally shorter for microbes under switchgrass than those under soy ( $p = 0.07$ ). We  
318 observed that microbes at 210-240 cm were activated to grow within 20 h after the yeast extract  
319 additions (Fig. 5c).

320  
321 Even though the maximum specific growth rate ( $\mu_{\max}$ ) declined between 0 cm and 90 cm ( $p = 0.011$ ),  
322 when we included all depths between 0-240 cm, the depth effect was not significant ( $p = 0.234$ ). The  
323 average value of maximum specific growth rate was  $0.33 \pm 0.01 \text{ h}^{-1}$  across depth and vegetation (Fig.  
324 5d). The maximum specific growth rate was independent of microbial biomass, regardless of whether  
325 we compared it to total microbial biomass (Pearson's correlation coefficient  $r = -0.41$ ,  $R^2 < 0.001$ ,  $p = 0.01$ )  
326 or relative active biomass (Pearson's correlation coefficient  $r = -0.18$ ,  $R^2 = 0.004$ ,  $p = 0.28$ ).

327  
328 Except for maximum specific growth rate, microbial growth parameters had a strong relationship with  
329 total OC, DOC, total N, and dissolved N (Table 1). Resource availability was positively related to total and  
330 relative active biomass, and negatively related to lag time. The  $\mu_{\max}$  values had no relationship with any  
331 soil chemistry index tested in this study.



## 332 DISCUSSION

333 Active microbial biomass drives biogeochemical processes (Couradeau et al., 2019; Geyer et al., 2016;  
334 Graham et al., 2016; Salazar-Villegas et al., 2016; Singer et al., 2017; Wutzler et al., 2012), but is hard to  
335 characterize due to the inefficiency of methods available to extract biomass, especially from deep soil  
336 layers, and the possibility of altering microbial physiological status during extraction (Blagodatskaya and  
337 Kuzyakov, 2013a). We reduced this limitation by using a growth kinetics model and examined how depth  
338 and vegetation type influence microbial growth potentials. To our knowledge, this is the first study to  
339 assess microbial growth parameters along deep soil profiles. Overall, we did not observe significant  
340 differences in resource availability between vegetation types (see discussion 3 below), thus we primarily  
341 focus on the effects of soil depth on microbial parameters. We demonstrate that microbial communities  
342 in deep soil layers can grow relatively quickly in spite of significant evidence of dormancy (lower relative  
343 active microbial biomass), and that dormancy becomes more common as soil depth increases.

344

### 345 1. Maximum specific growth rate remains unchanged across 240 cm of soil profiles

346 In this study, maximum specific growth rate was relatively similar across the whole soil profile (0-240  
347 cm; Fig. 5d), yielding an average of  $0.33 \pm 0.01 \text{ h}^{-1}$ . Our estimation is comparable to those observed in  
348 other studies; maximum specific growth rate was  $0.24\text{-}0.26 \text{ h}^{-1}$  in agricultural topsoils (Blagodatskaya et  
349 al., 2014),  $0.28\text{-}0.29 \text{ h}^{-1}$  in soil suspension amended with acetate (Van De Werf and Verstraete, 1987),  
350 and  $0.25\text{-}0.38 \text{ h}^{-1}$  in an Ap horizon of loamy soil (Blagodatskaya et al., 2009). We acknowledge that the  
351 third assumption of the Panikov model, the whole microbial community behaves as a single entity (see  
352 Methods), is likely to be violated in the real world. This is because distinct microbial taxa often exhibit  
353 different physiological properties, including growth rate (Ho et al., 2018; Keiblinger et al., 2010; Koch et  
354 al., 2018; Morrissey et al., 2019, 2016). As such, we likely overestimated the whole community growth

355 rate, because relatively slowly growing microbes may have not responded to the yeast extract additions  
356 and thus we may have only captured the growth of fast growers.

357 Contrary to our first hypothesis that decreasing resource availability would reduce maximum specific  
358 growth rate across the soil profiles, there was no clear relationship between resource availability (C and  
359 N) and maximum specific growth rate (Table 1). High resource availability, especially for C, often triggers  
360 microbial transition from dormant to potentially active states (Blagodatskaya and Kuzyakov, 2013b;  
361 Kovárová-Kovar and Egli, 1998; Lennon and Jones, 2011). Yet, once microbes start growing in response  
362 to new resources, antecedent resource availability (i.e., resource availability before adding substrate)  
363 may be less relevant to achieving maximum growth rates. Instead, our observation suggests that  
364 intrinsic limits of microbial physiology may determine maximum growth potential (e.g., how fast  
365 intracellular enzymes catalyze biomolecule synthesis, how constitutively vs. inducibly enzymes are  
366 produced)(Adadi et al., 2012), or by the evolutionary history of individual taxa (Morrissey et al., 2019).  
367 Although they did not test for maximum specific growth rate, Stone et al. (2014) demonstrated that  
368 some extracellular enzymes' biomass-normalized activity does not change with soil depth despite  
369 decreasing resource availability along soil depth gradients. Invariant maximum specific growth rates  
370 across depth indicate that microbial communities maintain their growth potential regardless of the  
371 environmental conditions they inhabit.

372 Relatively invariant maximum specific growth rates across the whole soil profile have two ecological  
373 implications. First, the potential for microbial C transformation may be comparable between surface and  
374 deep soil layers. Most previous studies exploring microbial activity have focused on surface soils,  
375 assuming microbial activity is negligible in deeper soil layers. However, our data suggests microbial  
376 communities in deep soils can grow and transform soil C as much as surface microbes do. We  
377 acknowledge that we have only limited amount of data at 240 cm, but our data suggest that microbial  
378 communities at 240 cm exhibited similar maximum specific growth rate to those at surface soils (Fig.

379 5d). In addition, deep soil microbial communities at 210-240 cm were activated by C addition within 20 h  
380 (Fig. 5c) and increased their respiration rate (Fig. 4). Our results are in line with recent findings that  
381 microbial C transformations and associated CO<sub>2</sub> fluxes in deep soils (70 cm) are substantial (Min et al.,  
382 2020), microbial activities below 30 cm can be as high (Jones et al., 2018) or higher (Stone et al., 2014)  
383 than those at the surface. Also, a recent study revealed that root exudates from switchgrass enhanced  
384 microbial production of extracellular polymeric substances and soil C stability along 120 cm of soil  
385 profiles (Sher et al., 2020). Thus, given the similar maximum specific growth rates across depth profiles,  
386 potential microbial C transformation in deep soil layers can be relatively high.

387 Second, model representation of microbial growth across soil depth profiles can be simplified. A growing  
388 number of studies demonstrate that including microbial parameters improves model projections of the  
389 global C budget (Allison et al., 2010; Salazar-Villegas et al., 2016; Wang et al., 2015; Wieder et al., 2015,  
390 2013). However, microbially-explicit models suffer from a lack of empirical knowledge on microbial  
391 parameters. Models require information on microbial biomass and biomass-specific rates, as process  
392 rates are often expressed as a product of the two (rates = biomass \* biomass-specific rates). Our study  
393 provides evidence that models may treat microbial growth rate as a constant with soil depth, putting  
394 more emphasis on the accurate estimation of microbial biomass. Importantly, it will be critical to  
395 quantify active biomass because the active pool of microbes is a better predictor for biogeochemical  
396 processes than total biomass (Barnard et al., 2015; Couradeau et al., 2019; Salazar-Villegas et al., 2016;  
397 Salazar et al., 2019). In this study, we observed that total biomass was less sensitive to changes in soil  
398 depth than relative active biomass. For instance, total biomass decreased by four times while active  
399 biomass decreased by 134 times when soil depth changed from 0-20 cm to 210-240 cm (Fig. 5a,b). This  
400 suggests that if models employ total biomass, the errors associated with microbial process rates  
401 estimation would amplify with soil depth. Empiricists need to use approaches that allow them to

402 distinguish active from total biomass and better inform models of how active biomass would vary when  
403 environmental conditions change.

404

## 405 2. Active biomass decreases, and lag time increases with depth

406 As we hypothesized (second hypothesis), relative active biomass declined, and lag time increased with  
407 depth (Fig. 5b,c). Reductions in resource availability likely drove these changes in the relative active  
408 biomass and lag time (Table 1). Under conditions with relatively low available resources, microbes may  
409 enter dormancy (Lennon and Jones, 2011) or inhabit poorly connected colonies without quorum sensing  
410 (Mitri et al., 2016), likely increasing microbial lag time. Our results that deep soil layers contain low  
411 available resources (Fig. 2) and relatively low active microbes (Fig. 5b), and that lag time quickly drops at  
412 a low range of relative active biomass (S3) highlight that any increases in resource availability would  
413 disproportionately influence microbial communities in deep soil layers compared to those in topsoil  
414 layers. That is, microbial communities in deep soil layers might quickly shorten lag time if increases in  
415 resource availability were to drive increases in relative active biomass.

416 The relative active biomass in this study ranged from 0.02 (=2%) in 0-20 cm soils to 0.0001 (=0.01%) in  
417 210-240 cm soils. Our estimates agree with other studies, where active biomass comprised less than  
418 0.05% (Salazar et al., 2019), 0.1-2% (Blagodatskaya and Kuzyakov, 2013b), 0.2-0.6% (Blagodatskaya et  
419 al., 2009), or less than 3.5% (Bloem et al., 1992) of total biomass. These results imply that soil microbial  
420 growth is restricted even at topsoil layers with greatest resource availability, possibly due to lack of  
421 signal molecules (quorum sensing)(Atkinson and Williams, 2009) or unbalance in stoichiometry between  
422 resources and microbial biomass (Keiblinger et al., 2010; Sterner and Elser, 2002). Dormancy is much  
423 more common in soil compared to other systems such as freshwater (~50%) or marine water (~35%)  
424 (Lennon and Jones, 2011). This may be due to heterogeneity in soil's physicochemical properties and

425 highly fluctuating environmental conditions (Wallenstein and Hall, 2012; Wang et al., 2014). A great  
426 proportion of dormancy in soils may help microbial communities cope with patchy and unpredictable  
427 environmental variations and sustain their function over longer timescales (Lennon and Jones, 2011).  
428 Many studies demonstrate that active biomass is closely associated with biogeochemical process rates  
429 (Salazar-Villegas et al., 2016; Salazar et al., 2019), but we did not detect a clear relationship between  
430 active biomass and basal respiration (basal respiration =  $0.092 * \text{active biomass} + 0.365$ ,  $R^2=0.12$ ). One  
431 explanation would be extremely low and highly variable basal respiration ( $0.45 \pm 0.02 \mu\text{g C-CO}_2 \text{ g}^{-1} \text{ dry}$   
432  $\text{soil h}^{-1}$ ; S2) due to relatively low soil OC (Fig. 2a). In other studies, reported basal respiration is higher  
433 than ours, at about  $180\text{-}250 \mu\text{g C-CO}_2 \text{ g}^{-1} \text{ dry soil h}^{-1}$  at 0-15 cm of soil depth in a temperate forest  
434 (Salazar-Villegas et al., 2016) and  $3\text{-}4 \mu\text{g C-CO}_2 \text{ g}^{-1} \text{ dry soil h}^{-1}$  from the top 10 cm of a temperate  
435 agricultural soil (Blagodatskaya et al., 2014). One study reports comparable values to our estimations at  
436  $0.18\text{-}0.24 \mu\text{g C-CO}_2 \text{ g}^{-1} \text{ dry soil h}^{-1}$  in mineral soils (Ritz and Wheatley, 1989). It is plausible that relatively  
437 low and variable basal respiration may have decreased our ability to detect differences between  
438 vegetation types or among depths, or a relationship between basal respiration and active biomass.

439

### 440 3. Deeply rooted plants have little effect on microbial growth parameters

441 Contrary to our third hypothesis, vegetation types did not influence microbial parameters in this study.  
442 The discrepancy between the expectation and the observations is consistent with our finding that  
443 switchgrass did not affect C and N availability (Fig. 2). Although the annual cropland was converted to  
444 switchgrass more than a decade ago at our study site (Sekaran et al., 2019) and switchgrass developed a  
445 deep rooting system (Fig. 1), the stocks of C and N, and  $^{14}\text{C}$  values of bulk soil under switchgrass were  
446 not distinguishable from those under soy (Fig. 2).

447 Several scenarios might explain the similar resource availability we observed between vegetation types.  
448 First, microbial respiration and priming may be greater under switchgrass than soy, canceling out likely  
449 higher plant C inputs from more, longer root growth. Soil C stock is a balance between inputs (litter, root  
450 exudates, root turnover) and outputs (respiration). If microbial respiration under switchgrass was  
451 enhanced (primed) due to greater plant C input, total soil C stocks may be similar between switchgrass  
452 and soy. Yet, similar basal respiration between the two vegetation types (S2) and similar  $^{14}\text{C}$  values in  
453 bulk soil OC (Fig. 2b) suggest that this scenario is unlikely. Second, despite more, longer root growth  
454 under the switchgrass, the amount of root exudates may be comparable between switchgrass and soy.  
455 We did not directly quantify root exudates, but similar DOC concentrations between vegetation types  
456 (Fig. 2c) suggest that this may be the case. Also, the main function may differ between deep and shallow  
457 roots. In a recent review (Lynch, 2019), deep roots are thought to collect water and nitrate, while  
458 shallow roots acquire nutrients such as phosphorus, calcium, and potassium. As nitrate is water-soluble,  
459 deep roots may not need to release root exudates as shallow roots do to mobilize nutrients. Third, the  
460 effects of vegetation and associated changes in the rooting depth on soil C stocks may be minimal in  
461 soils with high clay content and alkalinity. Recently, Slessarev et al. (2020b) demonstrated that C stocks  
462 were significantly higher under > 10-year-old switchgrass stands relative to annual crops in a low-  
463 nutrient sandy soil but found no consistent difference in the amount of C between deeply- and shallow-  
464 rooted plants in clayey soil. Soils at our study site were mostly clay loam (approximately 30% clay) with  
465 pH higher than 8.0 (S1). Thus, it is plausible that soil conditions may have influenced C accumulation  
466 along the soil profiles. Fourth, the annual cropland was fertilized in previous years and soy fixes N from  
467 the atmosphere. Contrary to switchgrass, the annual cropland is in rotation between soy and corn, and  
468 N fertilizer is used to enhance crop productivity. In addition, soy itself harbors N-fixing bacteria in roots.  
469 As such, it is plausible that residual N fertilizer applied in previous years and fixed N may persist to  
470 influence resource availability under soy. High dissolved N content under soy along the soil profiles

471 supports this argument (Fig. 2f). Taken together, the conversion from annual crops to switchgrass did  
472 not alter resource availability along soil depth profiles at our study site, which, in turn, marginally  
473 influenced microbial growth parameters between vegetation types.

474

## 475 **CONCLUSIONS**

476 Using a growth kinetics model, we estimated microbial growth parameters throughout soil depth  
477 profiles, a key knowledge gap for microbially-driven C dynamics models. While other studies have  
478 identified significant differences in profile-scale SOC inventories between switchgrass and shallow  
479 rooted conventional crops (Ferchaud et al., 2016; Liebig et al., 2005), in our study site, we did not  
480 observe enhanced soil C nor different microbial growth parameters under deep-rooted switchgrass  
481 compared to soy. The lack of a detectable plant-cover effect on both SOC stocks and microbial growth  
482 capacity may be a function of environmental factors, given that the response of bulk SOC pools to  
483 perennial cover can vary considerably as a function of soil properties, environmental conditions, and site  
484 history (Blanco-Canqui et al., 2005; Slessarev et al., 2020b). Depth profiles of microbial growth potential  
485 revealed increased dormancy rates at depth, but maximum growth potential was relatively similar  
486 across soil profiles. This suggests that a component of the microbial community at depth has the  
487 potential to rapidly exploit resources introduced by the deep root systems of perennial plants. Thus, to  
488 the extent that C inputs from deep root systems can increase SOC stocks, these deep SOC stocks are  
489 likely not immune from microbial transformation; rather, they might persist despite the presence of  
490 microbial consumers with a high capacity to assimilate fresh C.

491

492

493 **ACKNOWLEDGEMENTS**

494 We thank Drs. Sandeep Kumar and Udayakumar Sekaram at South Dakota State University for allowing  
495 us to collect soil samples in their long-term experimental field site. This work was supported by  
496 Lawrence Livermore National Laboratory's Lab Directed Research and Development program (#19-ERD-  
497 010); the National Research Foundation of Korea (NRF) grant funded by the Korea government (MSIT;  
498 NRF-2018R1A5A7025409); University of California Merced Chancellor's Fellowship to KM; University of  
499 California Merced and Falasco Endowed Chair to AAB, and work at LLNL was conducted under the  
500 auspices of DOE Contract DE-AC52- 07NA27344.

501

502



503 **REFERENCES**

- 504 Adadi, R., Volkmer, B., Milo, R., Heinemann, M., Shlomi, T., 2012. Prediction of microbial growth rate  
505 versus biomass yield by a metabolic network with kinetic parameters. *PLoS Computational Biology*  
506 8. doi:10.1371/journal.pcbi.1002575
- 507 Allison, S.D., Czimczik, C.I., Treseder, K.K., 2008. Microbial activity and soil respiration under nitrogen  
508 addition in Alaskan boreal forest. *Global Change Biology* 14, 1156–1168. doi:10.1111/j.1365-  
509 2486.2008.01549.x
- 510 Allison, S.D., Wallenstein, M.D., Bradford, M.A., 2010. Soil-carbon response to warming dependent on  
511 microbial physiology. *Nature Geoscience* 3, 336–340. doi:10.1038/ngeo846
- 512 Anderson, J., Domsch, K., 1978. Mineralization of bacteria and fungi in chloroform-fumiaged soils. *Soil*  
513 *Biology & Biochemistry* 10, 207–213.
- 514 Atkinson, S., Williams, P., 2009. Quorum sensing and social networking in the microbial world. *Journal of*  
515 *the Royal Society Interface* 6, 959–978. doi:10.1098/rsif.2009.0203
- 516 Barnard, R.L., Osborne, C.A., Firestone, M.K., 2015. Changing precipitation pattern alters soil microbial  
517 community response to wet-up under a Mediterranean-type climate. *ISME Journal* 9, 946–957.  
518 doi:10.1038/ismej.2014.192
- 519 Berhe, A.A., Harden, J.W., Torn, M.S., Harte, J., 2008. Linking soil organic matter dynamics and erosion-  
520 induced terrestrial carbon sequestration at different landform positions. *Journal of Geophysical*  
521 *Research* 113, G04039. doi:10.1029/2008JG000751
- 522 Blagodatskaya, E., Blagodatsky, S., Anderson, T.H., Kuzyakov, Y., 2014. Microbial growth and carbon use  
523 efficiency in the rhizosphere and root-free soil. *PLoS ONE* 9. doi:10.1371/journal.pone.0093282

- 524 Blagodatskaya, E., Blagodatsky, S., Dorodnikov, M., Kuzyakov, Y., 2010. Elevated atmospheric CO<sub>2</sub>  
525 increases microbial growth rates in soil: results of three CO<sub>2</sub> enrichment experiments. *Global*  
526 *Change Biology* 16, 836–848.
- 527 Blagodatskaya, E., Blagodatsky, S.A., Anderson, T., Kuzyakov, Y., 2009. Contrasting effects of glucose,  
528 living roots, and maize straw in microbial growth kinetics and substrate availability in sil. *European*  
529 *Journal of Soil Science* 60, 186–197.
- 530 Blagodatskaya, E., Kuzyakov, Y., 2013a. Active microorganisms in soil: Critical review of estimation  
531 criteria and approaches. *Soil Biology and Biochemistry* 67, 192–211.  
532 doi:10.1016/j.soilbio.2013.08.024
- 533 Blagodatskaya, E., Kuzyakov, Y., 2013b. Active microorganisms in soil: Critical review of estimation  
534 criteria and approaches. *Soil Biology and Biochemistry* 67, 192–211.  
535 doi:10.1016/j.soilbio.2013.08.024
- 536 Blagodatsky, S.A., Blagodatskaya, E. V, Anderson, T., Weigel, H., 2006. Kinetics of the respiratory  
537 response of the soil and rhizosphere microbial communities in a field experiment with an elevated  
538 concentration of atmospheric CO<sub>2</sub>. *Eurasian Soil Science* 39, 290–297.  
539 doi:10.1134/S1064229306030082
- 540 Blanco-Canqui, H., Lal, R., Lemus, R., 2005. Soil aggregate properties and organic carbon for switchgrass  
541 and traditional agricultural systems in the southeastern United States. *Soil Science* 170, 998–  
542 1012.
- 543 Bloem, J., de Ruyter, P.C., Koopman, G.J., Lebbink, G., Brussaard, L., 1992. Microbial numbers and activity  
544 in dried and rewetted arable soil under integrated and conventional management. *Soil Biology and*  
545 *Biochemistry* 24, 655–665. doi:10.1016/0038-0717(92)90044-X

546 Brewer, T., Aronson, E., Arogyaswamy, K., Billings, S., Bothoff, J., Campbell, A., Dove, N., Fairbanks, D.,  
547 Gallery, R., Hart, S., Kaye, J., King, G., Lohse, K., Maltz, M., O'Neil, C., Owens, S., Packman, A., Pett-  
548 Ridge, J., Plante, A., Richter, D., Silver, W., Yang, W., Fierer, N., 2019. Ecological and genomic  
549 attributes of novel bacterial taxa that thrive in subsurface soil horizons. *MBio* 10, mBio01318-19.

550 Contin, M., Todd, A., Brookes, P.C., 2001. The ATP concentration in the soil microbial biomass. *Soil*  
551 *Biology & Biochemistry* 33, 701–704.

552 Couradeau, E., Sasse, J., Goudeau, D., Nath, N., Hazen, T.C., Bowen, B.P., Chakraborty, R., Malmstrom,  
553 R.R., Northen, T.R., 2019. Probing the active fraction of soil microbiomes using BONCAT-FACS.  
554 *Nature Communications* 10. doi:10.1038/s41467-019-10542-0

555 Ferchaud, F., Vitte, G., Mary, B., 2016. Changes in soil carbon stocks under perennial and annual  
556 bioenergy crops. *GCB Bioenergy* 8, 290–306. doi:10.1111/gcbb.12249

557 Fierer, N., Allen, A.S., Schimel, J.P., Holden, P., 2003a. Controls on microbial CO<sub>2</sub> production: A  
558 comparison of surface and subsurface soil horizons. *Global Change Biology* 9, 1322–1332.  
559 doi:10.1046/j.1365-2486.2003.00663.x

560 Fierer, N., Schimel, J.P., Holden, P.A., 2003b. Variations in microbial community composition through  
561 two soil depth profiles. *Soil Biology & Biochemistry* 35, 167–176. doi:10.1016/S0038-  
562 0717(02)00251-1

563 Flint, R.F., 1955. Pleistocene Geology of Eastern South Dakota. U.S. Geological Survey 173.  
564 doi:10.3133/pp262

565 Gautier, D.L., 1986. Cretaceous shales from the western interior of North America: sulfur/carbon ratios  
566 and sulfur-isotope composition. *Geology* 14, 225–228. doi:10.1130/0091-  
567 7613(1986)14<225:CSFTWI>2.0.CO;2

- 568 Geyer, K., Kyker-Snowman, E., Grandy, A.S., Frey, S.D., 2016. Microbial carbon use efficiency : accounting  
569 for population , community , and ecosystem-scale controls over the fate of metabolized organic  
570 matter. *Biogeochemistry* 127, 173–188. doi:10.1007/s10533-016-0191-y
- 571 Graham, E.B., Knelman, J.E., Schindlbacher, A., Siciliano, S., Breulmann, M., Yannarell, A., Beman, J.M.,  
572 Abell, G., Philippot, L., Prosser, J., Foulquier, A., Yuste, J.C., Glanville, H.C., Jones, D.L., Angel, R.,  
573 Salminen, J., Newton, R.J., Bürgmann, H., Ingram, L.J., Hamer, U., Siljanen, H.M.P., Peltoniemi, K.,  
574 Potthast, K., Bañeras, L., Hartmann, M., Banerjee, S., Yu, R.Q., Nogaro, G., Richter, A., Koranda, M.,  
575 Castle, S.C., Goberna, M., Song, B., Chatterjee, A., Nunes, O.C., Lopes, A.R., Cao, Y., Kaisermann, A.,  
576 Hallin, S., Strickland, M.S., Garcia-Pausas, J., Barba, J., Kang, H., Isobe, K., Papaspyrou, S., Pastorelli,  
577 R., Lagomarsino, A., Lindström, E.S., Basiliko, N., Nemergut, D.R., 2016. Microbes as engines of  
578 ecosystem function: When does community structure enhance predictions of ecosystem  
579 processes? *Frontiers in Microbiology* 7, 1–10. doi:10.3389/fmicb.2016.00214
- 580 Hanson, C.A., Allison, S.D., Bradford, M.A., Wallenstein, M.D., Treseder, K.K., 2008. Fungal taxa target  
581 different carbon sources in forest soil. *Ecosystems* 11, 1157–1167. doi:10.1007/s10021-008-9186-4
- 582 Harmon, T.C., Dierick, D., Trahan, N., Allen, M.F., Rundel, P.W., Oberbauer, S.F., Schwendenmann, L.,  
583 Zelikova, T.J., 2015. Low-cost soil CO<sub>2</sub> efflux and point concentration sensing systems for  
584 terrestrial ecology applications. *Methods in Ecology and Evolution* 6, 1358–1362.  
585 doi:10.1111/2041-210X.12426
- 586 Hatzenpichler, R., Scheller, S., Tavormina, P.L., Babin, B.M., Tirrell, D.A., Orphan, V.J., 2014. In situ  
587 visualization of newly synthesized proteins in environmental microbes using amino acid tagging  
588 and click chemistry. *Environmental Microbiology* 16, 2568–2590. doi:10.1111/1462-2920.12436
- 589 He, S., Guo, L., Niu, M., Miao, F., Jiao, S., Hu, T., 2017. Ecological diversity and co- occurrence patterns of  
590 bacterial community through soil profile in response to long-term switchgrass cultivation. *Scientific*

- 591 Reports 7, 3608. doi:10.1038/s41598-017-03778-7
- 592 He, Y., Yang, J., Zhuang, Q., Harden, J.W., McGuire, A.D., Liu, Y., Wang, G., Gu, L., 2015. Incorporating  
593 microbial dormancy dynamics into soil decomposition models to improve quantification of soil  
594 carbon dynamics of northern temperate forests. *Journal of Geophysical Research: Biogeosciences*  
595 120, 2596–2611. doi:10.1002/2015JG003130
- 596 Ho, A., Lonardo, D.P. Di, Bodelier, P.L.E., 2018. Revisiting life strategy concepts in environmental  
597 microbial ecology 1–14. doi:10.1093/femsec/fix006
- 598 IPCC, 2013. *Climate change 2013: The physical science basis. Contribution of working group I to the Fifth*  
599 *Assessment Report of the Intergovernmental Panel on Climate Change.*
- 600 Jia, J., Cao, Z., Liu, C., Zhang, Z., Lin, L., Wang, Y., Haghpour, N., 2019. Climate warming alters subsoil but  
601 not topsoil carbon dynamics in alpine grassland. *Global Change Biology* 25, 4383–4393.
- 602 Jobbágy, E.G., Jackson, R.B., 2000. The vertical distribution of soil organic carbon and its relation to  
603 climate and vegetation. *Ecological Applications* 10, 423–436. doi:10.1890/1051-  
604 0761(2000)010[0423:TVDOSO]2.0.CO;2
- 605 Jobbágy, E.G., Jackson, R.B., Biogeochemistry, S., Mar, N., 2001. *The Distribution of Soil Nutrients with*  
606 *Depth : Global Patterns and the Imprint of Plants* Published by : Springer Stable URL :  
607 <http://www.jstor.org/stable/1469627> REFERENCES Linked references are available on JSTOR for  
608 this article : You may need to log i. *Biogeochemistry* 53, 51–77.
- 609 Jones, D.L., Magthab, E.A., Gleeson, D.B., Hill, P.W., Sánchez-Rodríguez, A.R., Roberts, P., Ge, T., Murphy,  
610 D. V., 2018. Microbial competition for nitrogen and carbon is as intense in the subsoil as in the  
611 topsoil. *Soil Biology and Biochemistry* 117, 72–82. doi:10.1016/j.soilbio.2017.10.024
- 612 Kao-kniffin, J., Balsler, T.C., 2008. Soil Fertility and the Impact of Exotic Invasion on Microbial

- 613 Communities in Hawaiian Forests 55–63. doi:10.1007/s00248-007-9323-1
- 614 Keiblinger, K.M., Hall, E.K., Wanek, W., Szukics, U., Hämmerle, I., Ellersdorfer, G., Böck, S., Strauss, J.,  
615 Sterflinger, K., Richter, A., Zechmeister-Boltenstern, S., 2010. The effect of resource quantity and  
616 resource stoichiometry on microbial carbon-use-efficiency. *FEMS Microbiology Ecology* 73, no-no.  
617 doi:10.1111/j.1574-6941.2010.00912.x
- 618 Kennedy, M.J., Pevear, D.R., Hill, R.J., 2002. Mineral surface control of organic carbon in black shale.  
619 *Science* 295, 657–660. doi:10.1126/science.1066611
- 620 Koch, B., McHugh, T., Hayer, M., Schwartz, E., Blazewicz, S., Dijkstra, P., van Gestel, N., Marks, J., Mau,  
621 R., Morrisey, E., Pett-ridge, J., Hungate, B., 2018. Estimating taxon-specific population dynamics in  
622 intact microbial communities. *Ecosphere* 9, DOI:10.1002/ecs2.2090.
- 623 Kögel-Knabner, I., Guggenberger, G., Kleber, M., Kandeler, E., Kalbitz, K., Scheu, S., Eusterhues, K.,  
624 Leinweber, P., 2008. Organo-mineral associations in temperate soils : Integrating biology,  
625 mineralogy, and organic matter chemistry. *Journal of Plant Nutrition and Soil Science* 171, 61–82.  
626 doi:10.1002/jpln.200700048
- 627 Kohl, L., Morrill, P.L., Biesen, G. Van, Ziegler, S.E., 2015. Distinct fungal and bacterial  $\delta^{13}\text{C}$  signatures as  
628 potential drivers of increasing  $\delta^{13}\text{C}$  of soil organic matter with depth 13–26. doi:10.1007/s10533-  
629 015-0107-2
- 630 Kovárová-Kovar, K., Egli, T., 1998. Growth Kinetics of Suspended Microbial Cells: From Single-Substrate-  
631 Controlled Growth to Mixed-Substrate Kinetics. *Microbiology and Molecular Biology Reviews* 62,  
632 646–666. doi:10.1128/membr.62.3.646-666.1998
- 633 Lehmeier, C.A., Ballantyne IV, F., Min, K., Billings, S.A., 2016. Temperature-mediated changes in  
634 microbial carbon use efficiency and  $^{13}\text{C}$  discrimination. *Biogeosciences* 13, 3319–3329.

- 635           doi:10.5194/bgd-12-17367-2015
- 636   Lennon, J.T., Jones, S.E., 2011. Microbial seed banks: The ecological and evolutionary implications of  
637           dormancy. *Nature Reviews Microbiology* 9, 119–130. doi:10.1038/nrmicro2504
- 638   Li, J., Mau, R., Dijkstra, P., Koch, B., Schwartz, E., Purcell, A., Liu, X., Morrissey, E.M., Blazewicz, S.J., Pett-  
639           Ridge, J., Stone, B., Hayer, M., Hungate, B., 2019. Predictive genomic traits for bacterial growth in  
640           culture versus actual growth in soil. *ISME Journal* 13, 2162–2172.
- 641   Liebig, M., Johnson, H., Hanson, J., Frank, A., 2005. Soil carbon under switchgrass stands and cultivated  
642           cropland. *Biomass & Bioenergy* 28, 347–354. doi:10.1016/j.biombioe.2004.11.004
- 643   Lynch, J.P., 2019. Root phenotypes for improved nutrient capture: an underexploited opportunity for  
644           global agriculture. *New Phytologist* 223, 548–564. doi:10.1111/nph.15738
- 645   Manzoni, S., Taylor, P., Richter, A., Porporato, A., 2012. Environmental and stoichiometric controls on  
646           microbial carbon-use efficiency in soils. *New Phytologist* 196, 79–91.
- 647   Martens, R., 1995. Current methods for measuring microbial biomass C in soil : Potentials and  
648           limitations. *Biology and Fertility of Soils* 19, 87–99.
- 649   Martin, J., Sawyer, F., Fahrenbach, M., Tomhave, D., Schulz, L., 2004. Geologic map of South Dakota,  
650           South Dakota Department of Environment & Natural Resources\_Geological Survey.
- 651   McGowan, A., Nicolosa, R., Diop, H., Roozeboom, K., Rice, C., 2019. Soil organic carbon, aggregation, and  
652           microbial community structure in annual and perennial biofuel crops. *Agronomy Journal* 111, 128–  
653           142.
- 654   Min, K., Berhe, A.A., Khoi, C.M., van Asperen, H., Gillabel, J., Six, J., 2020. Differential effects of wetting  
655           and drying on soil CO<sub>2</sub> concentration and flux in near-surface vs. deep soil layers. *Biogeochemistry*

- 656 148, 255–269. doi:10.1007/s10533-020-00658-7
- 657 Min, K., Lehmeier, C.A., Ballantyne, F.I., Billings, S.A., 2016. Carbon availability modifies temperature  
658 responses of heterotrophic microbial respiration, carbon uptake affinity, and stable carbon isotope  
659 discrimination. *Frontiers in Microbiology* 7, doi: 10.3389/fmicb.2016.02083.  
660 doi:10.3389/fmicb.2016.02083
- 661 Mitchell, D.A., Von Meien, O.F., Krieger, N., Dalsenter, F.D.H., 2004. A review of recent developments in  
662 modeling of microbial growth kinetics and intraparticle phenomena in solid-state fermentation.  
663 *Biochemical Engineering Journal* 17, 15–26. doi:10.1016/S1369-703X(03)00120-7
- 664 Mitri, S., Clarke, E., Foster, K.R., 2016. Resource limitation drives spatial organization in microbial groups.  
665 *ISME Journal* 10, 1471–1482. doi:10.1038/ismej.2015.208
- 666 Morrissey, E.M., Dijkstra, P., Koch, B., Allen, K., Blazewicz, S., Hofmockel, K., Pett-Ridge, J., Hungate, B.A.,  
667 2019. Evolutionary history constrains microbial traits across environmental variation. *Nature*  
668 *Ecology and Evolution* 3, 1064–1069.
- 669 Morrissey, E.M., Mau, R.L., Schwartz, E., Caporaso, J.G., Dijkstra, P., Van Gestel, N., Koch, B.J., Liu, C.M.,  
670 Hayer, M., McHugh, T.A., Marks, J.C., Price, L.B., Hungate, B.A., 2016. Phylogenetic organization of  
671 bacterial activity. *ISME Journal* 10, 2336–2340. doi:10.1038/ismej.2016.28
- 672 Panikov, N.S., 1995. *Microbial growth kinetics*. Springer.
- 673 Panikov, N.S., Sizova, M. V., 1996. A kinetic method for estimating the biomass of microbial functional  
674 groups in soil. *Journal of Microbiological Methods* 24, 219–230. doi:10.1016/0167-7012(95)00074-  
675 7
- 676 Paustian, K., Lehmann, J., Ogle, S., Reay, D., Robertson, G.P., Smith, P., 2016. Climate-smart soils. *Nature*  
677 532, 49–57. doi:10.1038/nature17174



- 678 Pett-Ridge, J., Firestone, M.K., 2017. Rhizosphere Using stable isotopes to explore root-microbe-mineral  
679 interactions in soil. *Rhizosphere* 1–10. doi:10.1016/j.rhisph.2017.04.016
- 680 Pries, C.E.H., Castanha, C., Porras, R.C., Torn, M.S., 2017. The whole-soil carbon flux in response to  
681 warming. *Science* 1423, 1420–1423.
- 682 Ritz, K., Wheatley, R., 1989. Effects of water amendment on basal and substrate-induced respiration  
683 rates of mineral soils. *Biology and Fertility of Soils* 8, 242–246.
- 684 Robertson, G.P., Coleman, D.C., Bledsoe, C., Sollins, P., 1999. Standard soil methods for long-term  
685 ecological research. Oxford University Press, New York.
- 686 Rumpel, C., A, R.-R., Gonzalez-Perez, J., Arbelo, C., Chabbi, A., Nunan, N., Gonzalez-Vila, F., 2012.  
687 Contrasting composition of free and mineral-bound organic matter in top- and subsoil horizons of  
688 Andosols. *Biology and Fertility of Soils* 48, 401–411. doi:10.1007/s00374-011-0635-4
- 689 Rumpel, C., Kögel-Knabner, I., 2011. Deep soil organic matter — a key but poorly understood  
690 component of terrestrial C cycle. *Plant and Soil* 338, 143–158. doi:10.1007/s11104-010-0391-5
- 691 Salazar-Villegas, A., Blagodatskaya, E., Dukes, J.S., 2016. Changes in the size of the active microbial pool  
692 explain short-term soil respiratory responses to temperature and moisture. *Frontiers in*  
693 *Microbiology* 7, 1–10. doi:10.3389/fmicb.2016.00524
- 694 Salazar, A., Lennon, J.T., Dukes, J.S., 2019. Microbial dormancy improves predictability of soil respiration  
695 at the seasonal time scale. *Biogeochemistry* 144, 103–116. doi:10.1007/s10533-019-00574-5
- 696 Schmidt, M.W.I., Torn, M.S., Abiven, S., Dittmar, T., Guggenberger, G., Janssens, I. a., Kleber, M., Kögel-  
697 Knabner, I., Lehmann, J., Manning, D. a. C., Nannipieri, P., Rasse, D.P., Weiner, S., Trumbore, S.E.,  
698 2011. Persistence of soil organic matter as an ecosystem property. *Nature* 478, 49–56.  
699 doi:10.1038/nature10386

- 700 Schwartz, E., Hayer, M., Hungate, B.A., Koch, B.J., Mchugh, T.A., Mercurio, W., Morrissey, E.M.,  
701 Soldanova, K., 2016. Stable isotope probing with  $^{18}\text{O}$ -water to investigate microbial growth and  
702 death in environmental samples. *Current Opinion in Biotechnology* 41, 14–18.  
703 doi:10.1016/j.copbio.2016.03.003
- 704 Sekaran, U., Mccoy, C., Kumar, S., Subramanian, S., 2019. Soil microbial community structure and  
705 enzymatic activity responses to nitrogen management and landscape positions in switchgrass  
706 (*Panicum virgatum* L.). *Gloibal Change Biology: Bioenergy* 11, 836–851. doi:10.1111/gcbb.12591
- 707 Sher, Y., Baker, N.R., Herman, D., Fossum, C., Hale, L., Zhang, X., Nuccio, E., Saha, M., Zhou, J., Pett-  
708 Ridge, J., Firestone, M., 2020. Microbial extracellular polysaccharide production and aggregate  
709 stability controlled by switchgrass (*Panicum virgatum*) root biomass and soil water potential. *Soil*  
710 *Biology and Biochemistry* 143. doi:10.1016/j.soilbio.2020.107742
- 711 Singer, E., Wagner, M., Woyke, T., 2017. Capturing the genetic makeup of the active microbiome in situ.  
712 *ISME Journal* 11, 1949–1963. doi:10.1038/ismej.2017.59
- 713 Slessarev, E.W., Lin, Y., Jiménez, B.Y., Homyak, P.M., Chadwick, O.A., D’Antonio, C.M., Schimel, J.P.,  
714 2020a. Cellular and extracellular C contributions to respiration after wetting dry soil.  
715 *Biogeochemistry* 147, 307–324. doi:10.1007/s10533-020-00645-y
- 716 Slessarev, E.W., Nuccio, E.E., McFarlane, K.J., Ramon, C.E., Saha, M., Firestone, M.K., Pett-Ridge, J.,  
717 2020b. Quantifying the effects of switchgrass (*Panicum virgatum*) on deep organic C stocks using  
718 natural abundance  $^{14}\text{C}$  in three marginal soils. *GCB Bioenergy* 1–14. doi:10.1111/gcbb.12729
- 719 Sterner, R.W., Elser, J., 2002. *Ecological Stoichiometry: The biology of elements from molecules to the*  
720 *biosphere*. Princeton University Press.
- 721 Stone, M.M., Deforest, J.L., Plante, A.F., 2014. Changes in extracellular enzyme activity and microbial

- 722 community structure with soil depth at the Luquillo Critical Zone Observatory. *Soil Biology and*  
723 *Biochemistry* 75, 237–247. doi:10.1016/j.soilbio.2014.04.017
- 724 Stuiver, M., Polach, H., 1977. Discussion reporting of <sup>14</sup>C data. *Radiocarbon* 19, 355–363.
- 725 Tomhave, D.W., Schulz, L.D., 2004. Bedrock Geologic Map Showing Configuration of the Bedrock Surface  
726 in South Dakota East of the Missouri River 100.
- 727 Trutko, S.M., Medentsev, A.G., Korobov, V.P., Akimenko, V.K., 1984. Cyanide-resistant respiration of  
728 bacteria and its relation to oversynthesis of metabolites. *Mikrobiologiya* 53, 21–27.
- 729 Van De Werf, H., Verstraete, W., 1987. Estimation of active soil microbial biomass by mathematical  
730 analysis of respiration curves: Development and verification of the model. *Soil Biology and*  
731 *Biochemistry* 19, 253–260. doi:10.1016/0038-0717(87)90006-X
- 732 Vance, E.D., Brookes, P.C., Jenkinson, D.S., 1987. An extraction method for measuring soil microbial  
733 biomass C. *Soil Biology & Biochemistry* 19, 703–707.
- 734 Vogel, J., Southon, J., Nelson, D., Brown, T., 1984. Performance of catalytically condensed carbon for use  
735 in accelerated mass spectrometry. *Nuclear Instruments and Methods in Physics Research Section B*  
736 5, 289–293.
- 737 Wallenstein, M., Hall, E., 2012. A trait-based framework for predicting when and where microbial  
738 adaptation to climate change will affect ecosystem functioning. *Biogeochemistry* 109, 35–47.  
739 doi:10.1007/s10533-011-9641-8
- 740 Wang, G., Jagadamma, S., Mayes, M.A., Schadt, C.W., Megan Steinweg, J., Gu, L., Post, W.M., 2015.  
741 Microbial dormancy improves development and experimental validation of ecosystem model. *ISME*  
742 *Journal* 9, 226–237. doi:10.1038/ismej.2014.120

- 743 Wang, G., Mayes, M.A., Gu, L., Schadt, C.W., 2014. Representation of dormant and active microbial  
744 dynamics for ecosystem modeling. *PLoS ONE* 9. doi:10.1371/journal.pone.0089252
- 745 Weishaar, J., Aiken, G., Bergamaschi, B., Fram, M., R, F., Mopper, K., 2003. Evaluation of specific  
746 ultraviolet absorbance as an indicator of the chemical composition and reactivity of dissolved  
747 organic carbon. *Environmental Science & Technology* 37, 4702–4708.
- 748 Wieder, W.R., Allison, S.D., Davidson, E.A., Georgiou, K., Hararuk, O., He, Y., Hopkins, F., Luo, Y., Smith,  
749 M.J., Sulman, B., Todd-Brown, K., Wang, Y.P., Xia, J., Xu, X., 2015. Explicitly representing soil  
750 microbial processes in Earth system models. *Global Biogeochemical Cycles* 29, 1782–1800.  
751 doi:10.1002/2015GB005188
- 752 Wieder, W.R., Bonan, G.B., Allison, S.D., 2013. Global soil carbon projections are improved by modelling  
753 microbial processes. *Nature Climate Change* 3, 1–4. doi:10.1038/nclimate1951
- 754 Wright, L., 2007. Historical perspective on how and why switchgrass was selected as a “model” high-  
755 potential energy crop.
- 756 Wutzler, T., Blagodatsky, S.A., Blagodatskaya, E., Kuzyakov, Y., 2012. Soil microbial biomass and its  
757 activity estimated by kinetic respiration analysis e Statistical guidelines. *Soil Biology and*  
758 *Biochemistry* 45, 102–112. doi:10.1016/j.soilbio.2011.10.004
- 759 Zha, J., Zhuang, Q., 2020. Microbial dormancy and its impacts on northern temperate and boreal  
760 terrestrial ecosystem carbon budget. *Biogeosciences* 17, 4591–4610. doi:10.5194/bg-17-4591-2020
- 761
- 762

763 **FIGURE LEGENDS**

764 Fig.1. Depth distribution of root biomass under switchgrass (blue) and soy (orange) in clay-loam  
765 agricultural fields in South Dakota.

766 Fig.2. Depth distribution of soil chemistry variables measured in switchgrass (blue) and soy (orange)  
767 clay-loam agricultural fields in South Dakota: (a) total organic carbon; (b)  $^{14}\text{C}$ ; (c) dissolved organic  
768 carbon; (d) specific UV absorbance of dissolved organic carbon (an index of aromaticity of dissolved  
769 organic carbon); (e) total nitrogen; (f) dissolved nitrogen. (n=3, error bars represent  $\pm 1$  standard error).

770 Fig.3. An example plot of soil microbial respiration from an agricultural soil incubated with (a) water only  
771 or (b) yeast extract plus water. The red dashed line indicates the time when water or yeast extract plus  
772 water was added.

773 Fig.4. Fitted model of microbial respiration from agricultural soil incubated with yeast extract for  
774 switchgrass (left) and soy (right) soils from 0 - 240 cm soil profiles. We used a growth kinetics model  
775 described in Panikov (1995). Different colors indicate different depth intervals. For visual simplicity,  
776 error bars have been omitted.

777 Fig.5. Depth distribution of microbial growth parameters estimated from a growth kinetics model in  
778 Panikov (1995), measured in switchgrass (blue) and soy (orange) soils incubated with yeast extract: (a)  
779 total microbial biomass before exponential growth; (b) relative active biomass before exponential  
780 growth, which varies between 0 and 1. If 0, all the biomass is dormant. If 1, all microbes actively grow  
781 and divide; (c) lag time, the response time of microbial community respiration rates to the additions of  
782 yeast extract; (d) maximum specific growth rate ( $\mu_{\text{max}}$ ), the maximum microbial growth potential per unit  
783 biomass per unit time (n=3, error bars represent  $\pm 1$  standard error).

784

785 **TABLES**

786 Table 1. Pearson's correlation coefficient between growth kinetics parameters and soil chemistry.

|                         | OC           | DOC          | SUVA  | N            | Dissolved N  |
|-------------------------|--------------|--------------|-------|--------------|--------------|
| Total biomass           | <b>0.47</b>  | <b>0.46</b>  | 0.09  | <b>0.49</b>  | <b>0.41</b>  |
| Relative active biomass | <b>0.63</b>  | <b>0.75</b>  | 0.28  | <b>0.60</b>  | <b>0.76</b>  |
| Lag time                | <b>-0.70</b> | <b>-0.70</b> | -0.25 | <b>-0.63</b> | <b>-0.59</b> |
| $\mu_{\max}$            | 0.31         | 0.22         | 0.12  | 0.26         | 0.15         |

787 Bold when  $p < 0.05$

788

789 SUPPLEMENTARY FIGURES

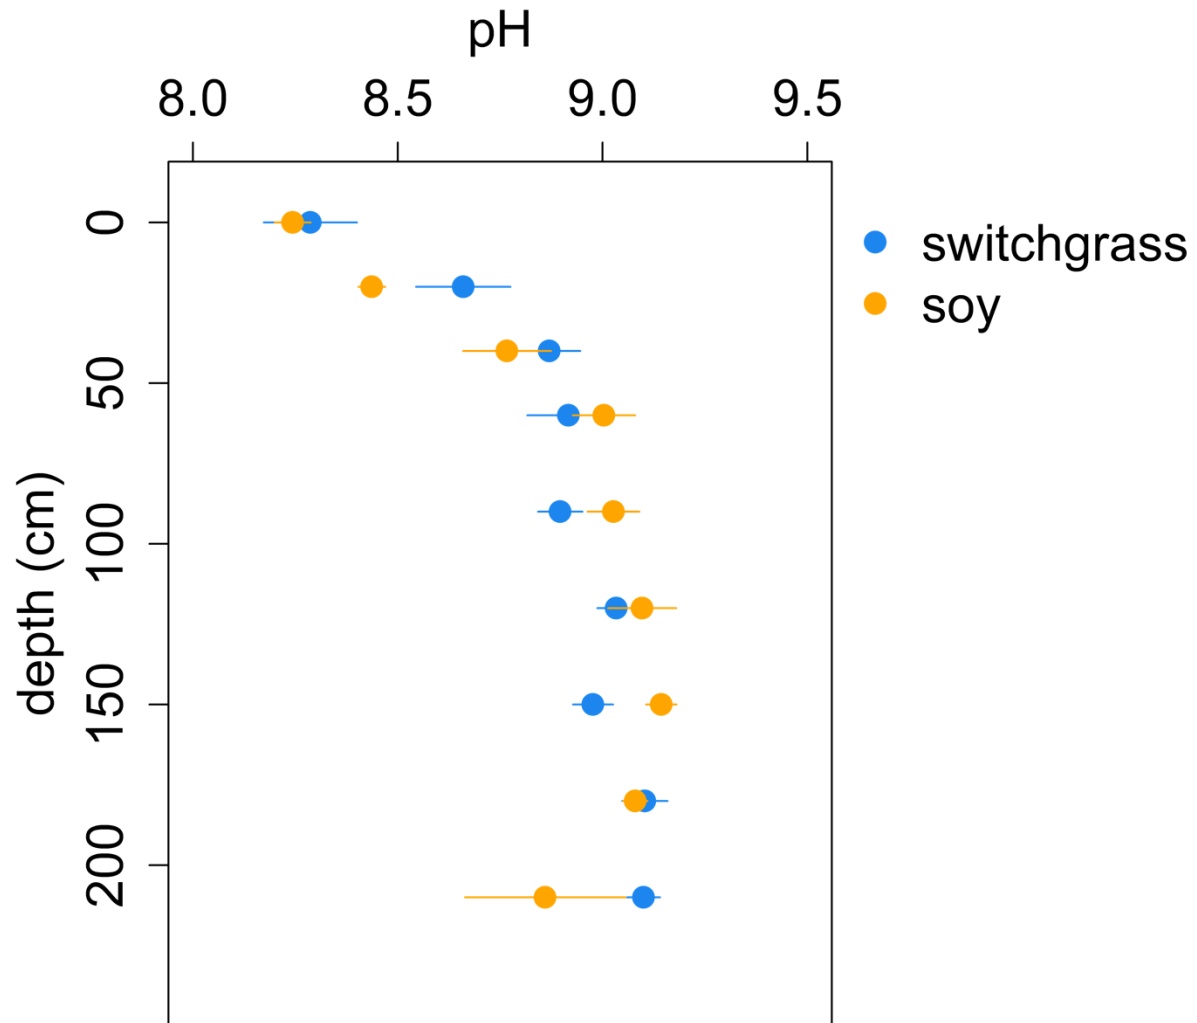

790

791 S1. Depth profile of soil pH for switchgrass (blue) and soy (orange) (n=3, error bars represent  $\pm 1$

792 standard error).

793

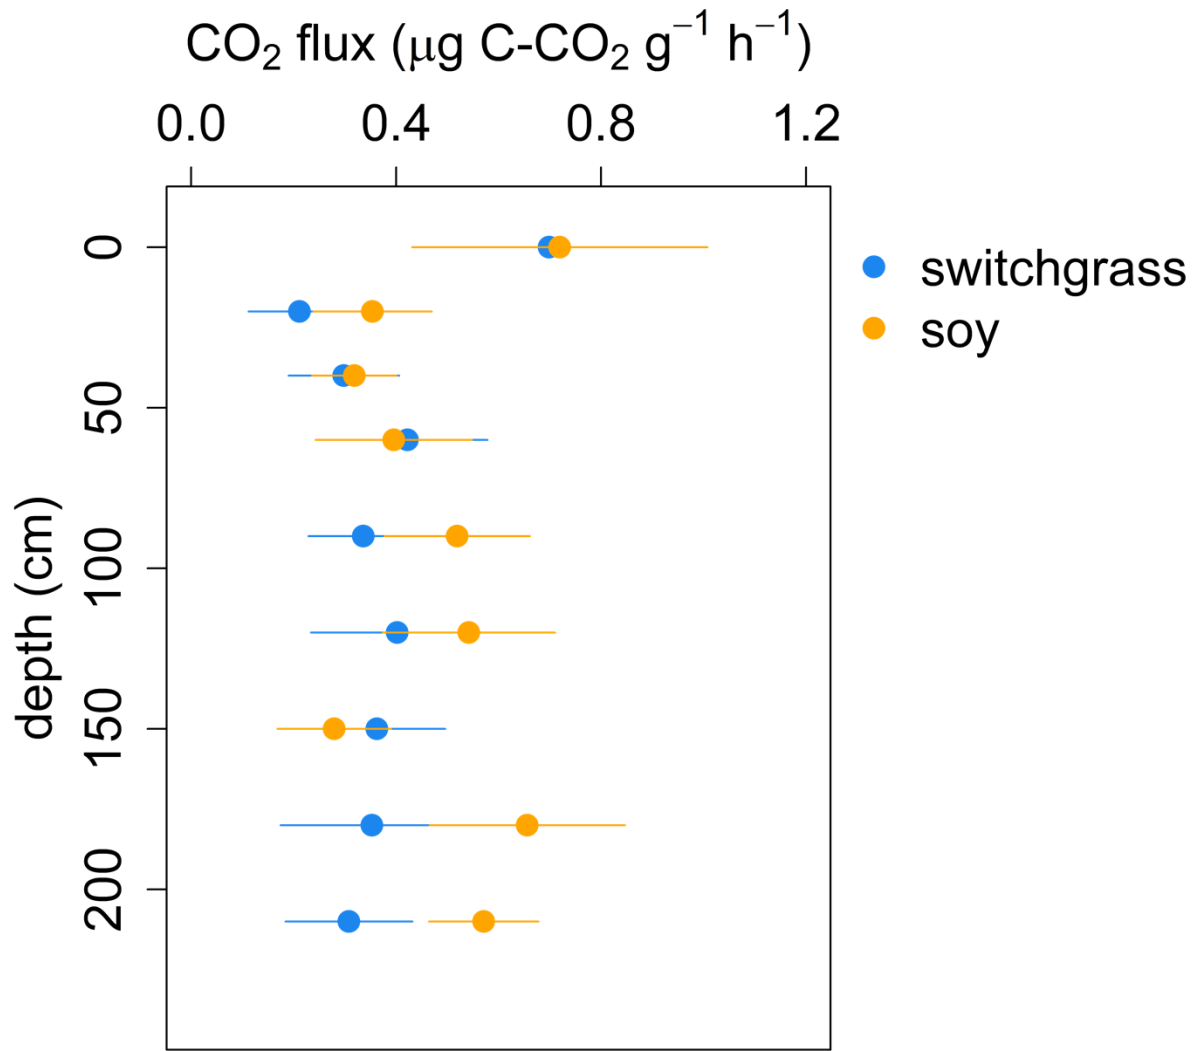

794

795 S2. Microbial basal respiration for switchgrass (blue) and soy (orange) soils collected along a 240 cm  
796 depth profile from clay-loam agricultural fields in South Dakota (n=3, error bars represent ± 1 standard  
797 error).

798

799

800



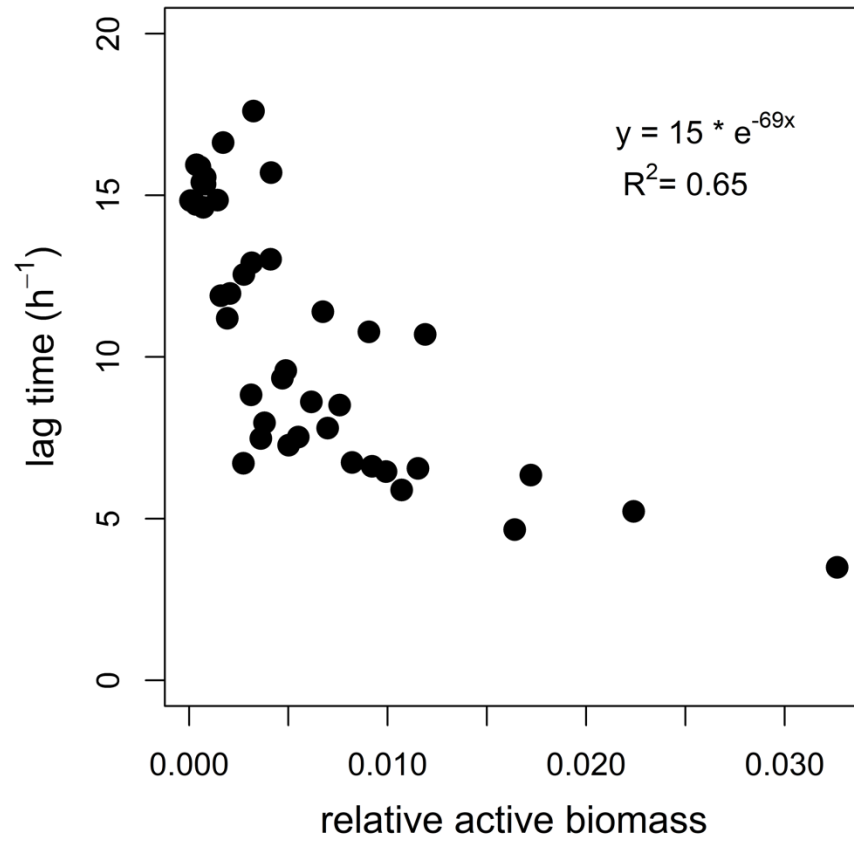

801

802 S3. Microbial lag time plotted against relative active biomass across vegetation type and depth.

803

switchgrass

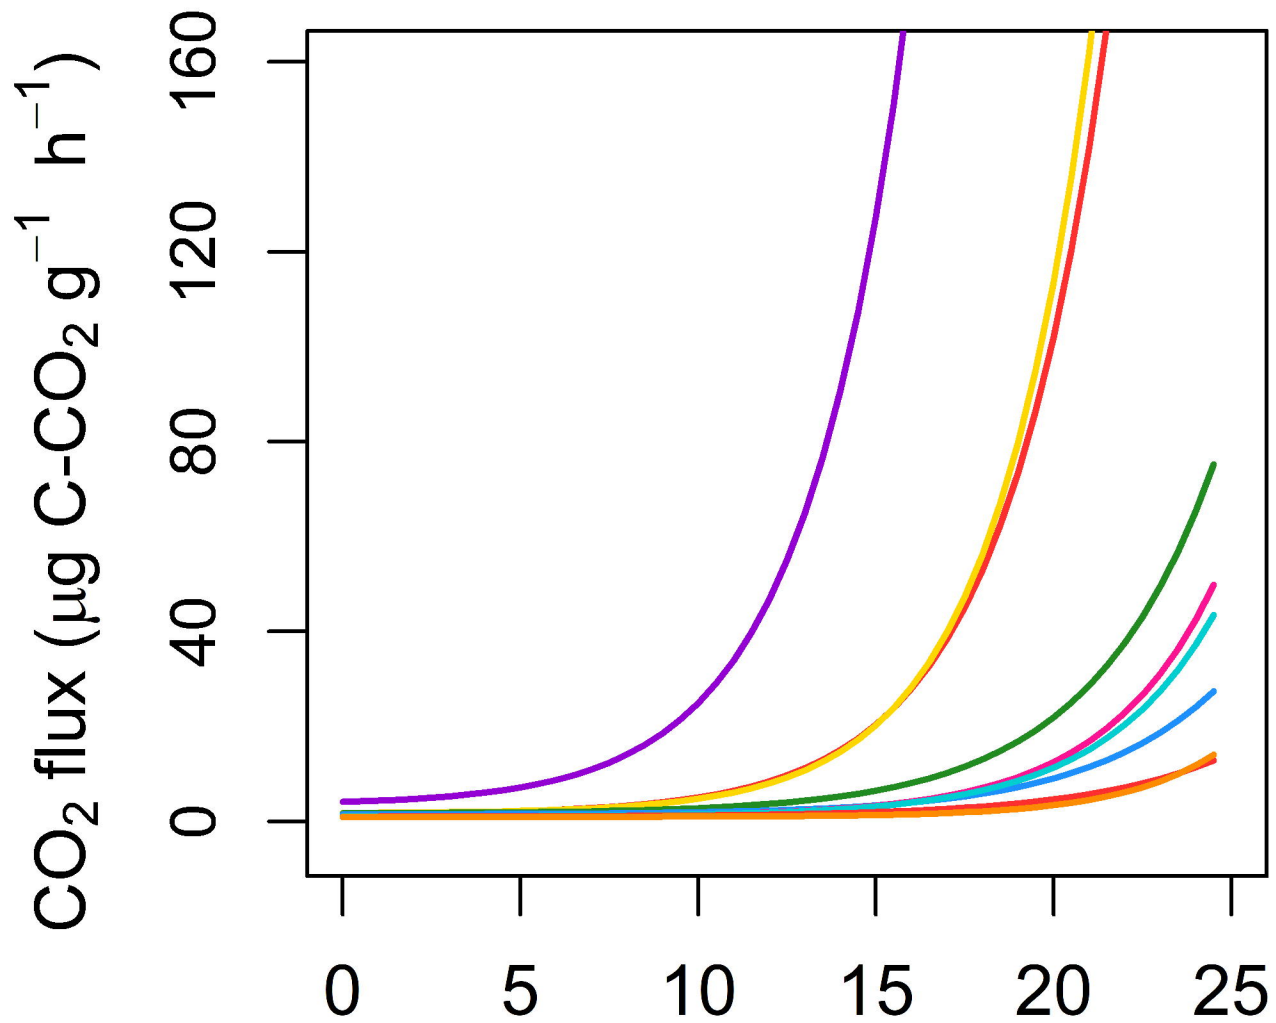

soy

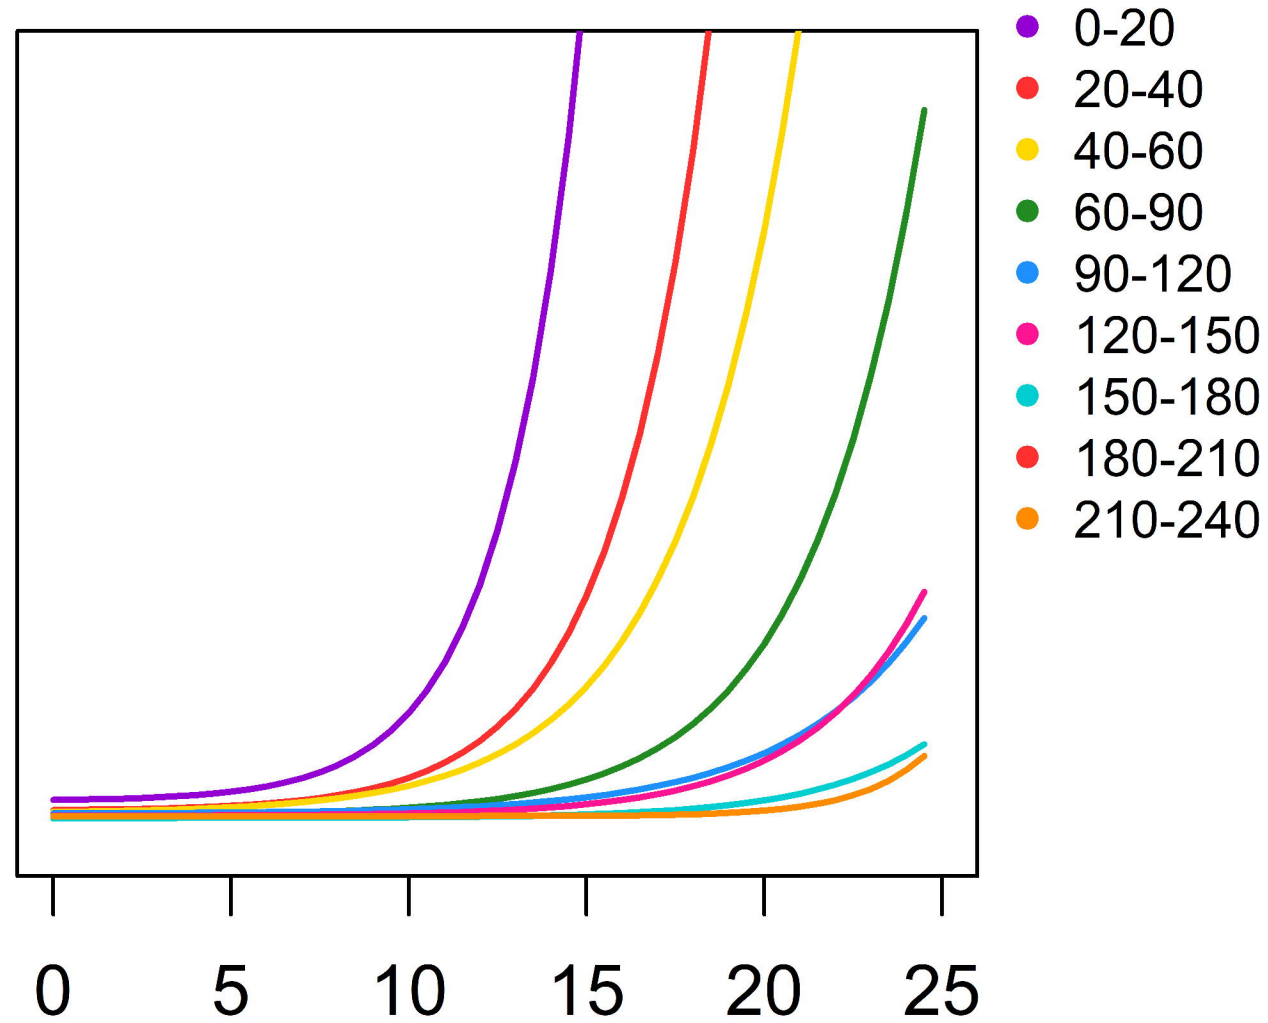

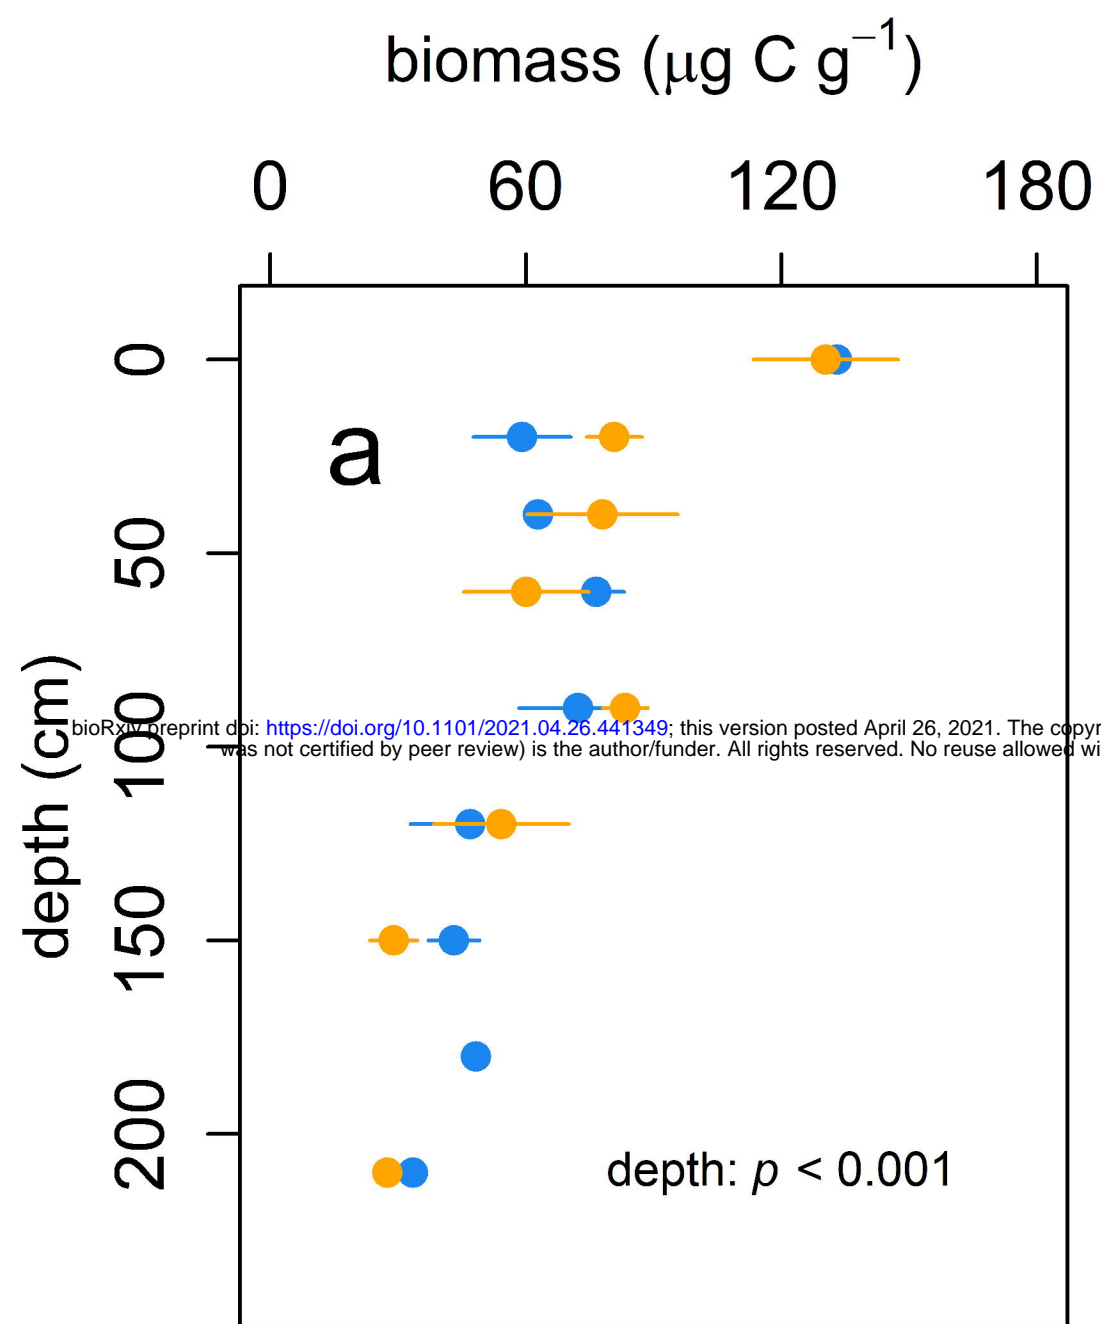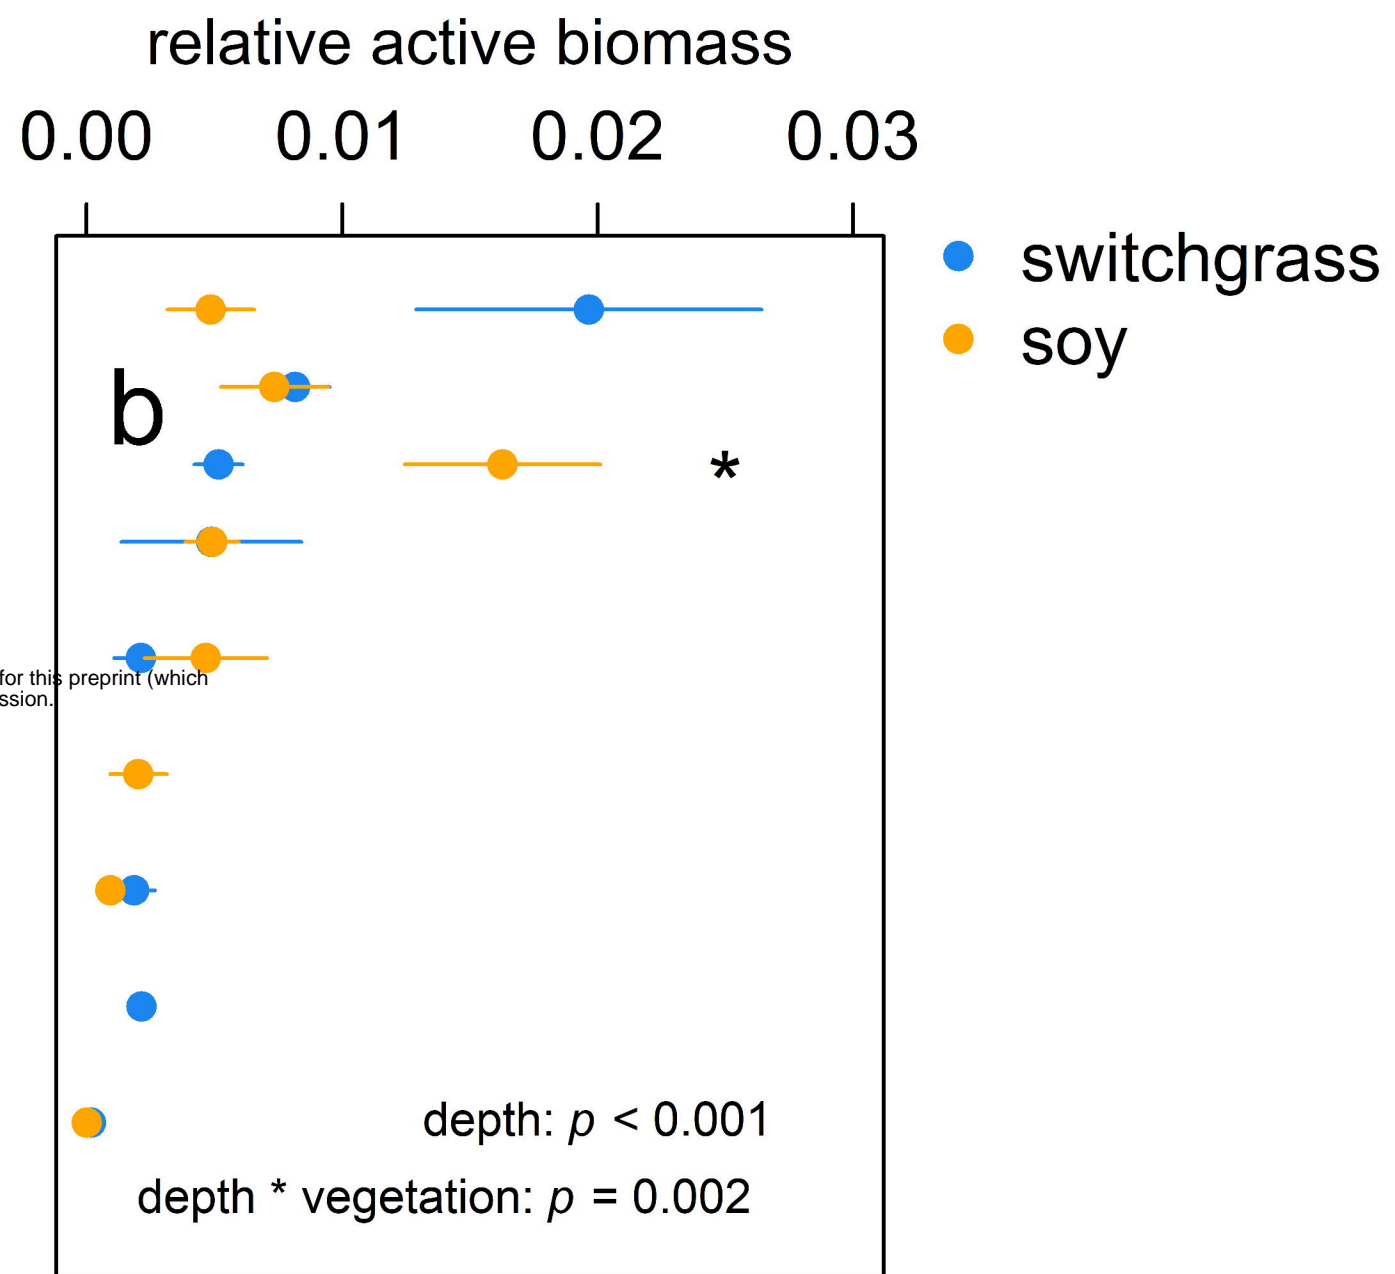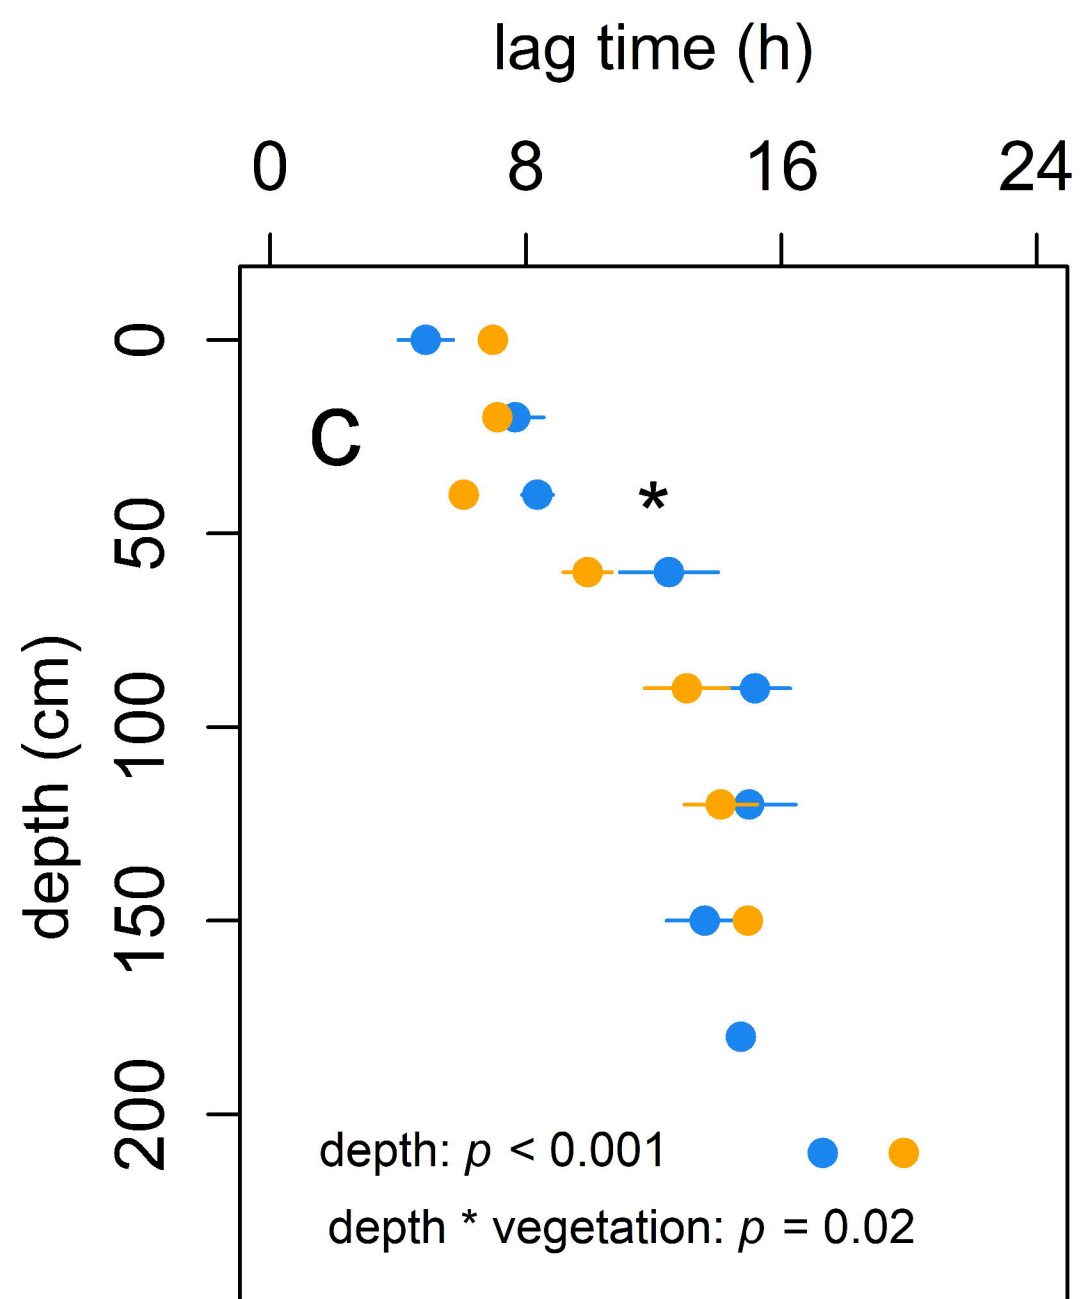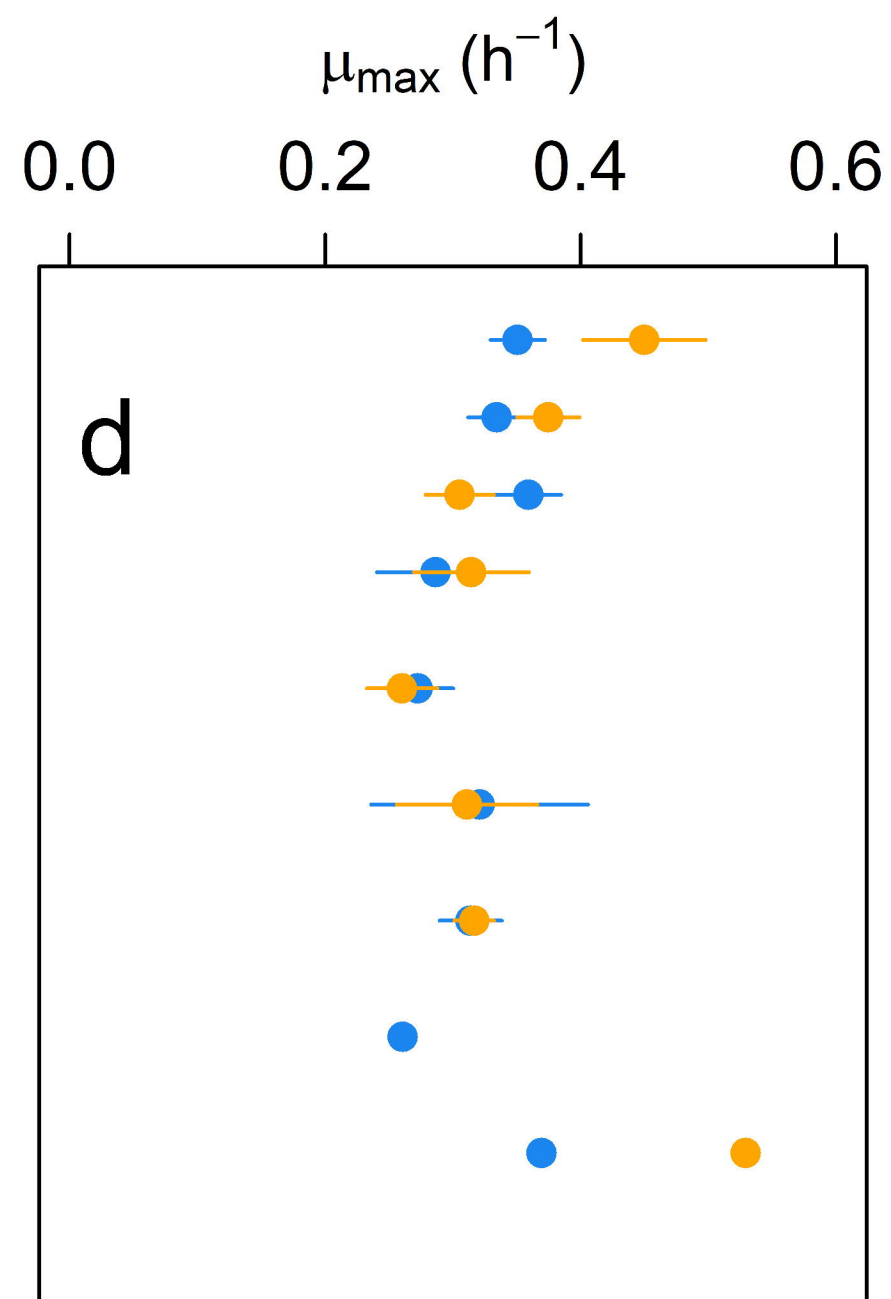

# dry root mass (g)

bioRxiv preprint doi: <https://doi.org/10.1101/2021.04.26.441349>; this version posted April 26, 2021. The copyright holder for this preprint (which was not certified by peer review) is the author/funder. All rights reserved. No reuse allowed without permission.

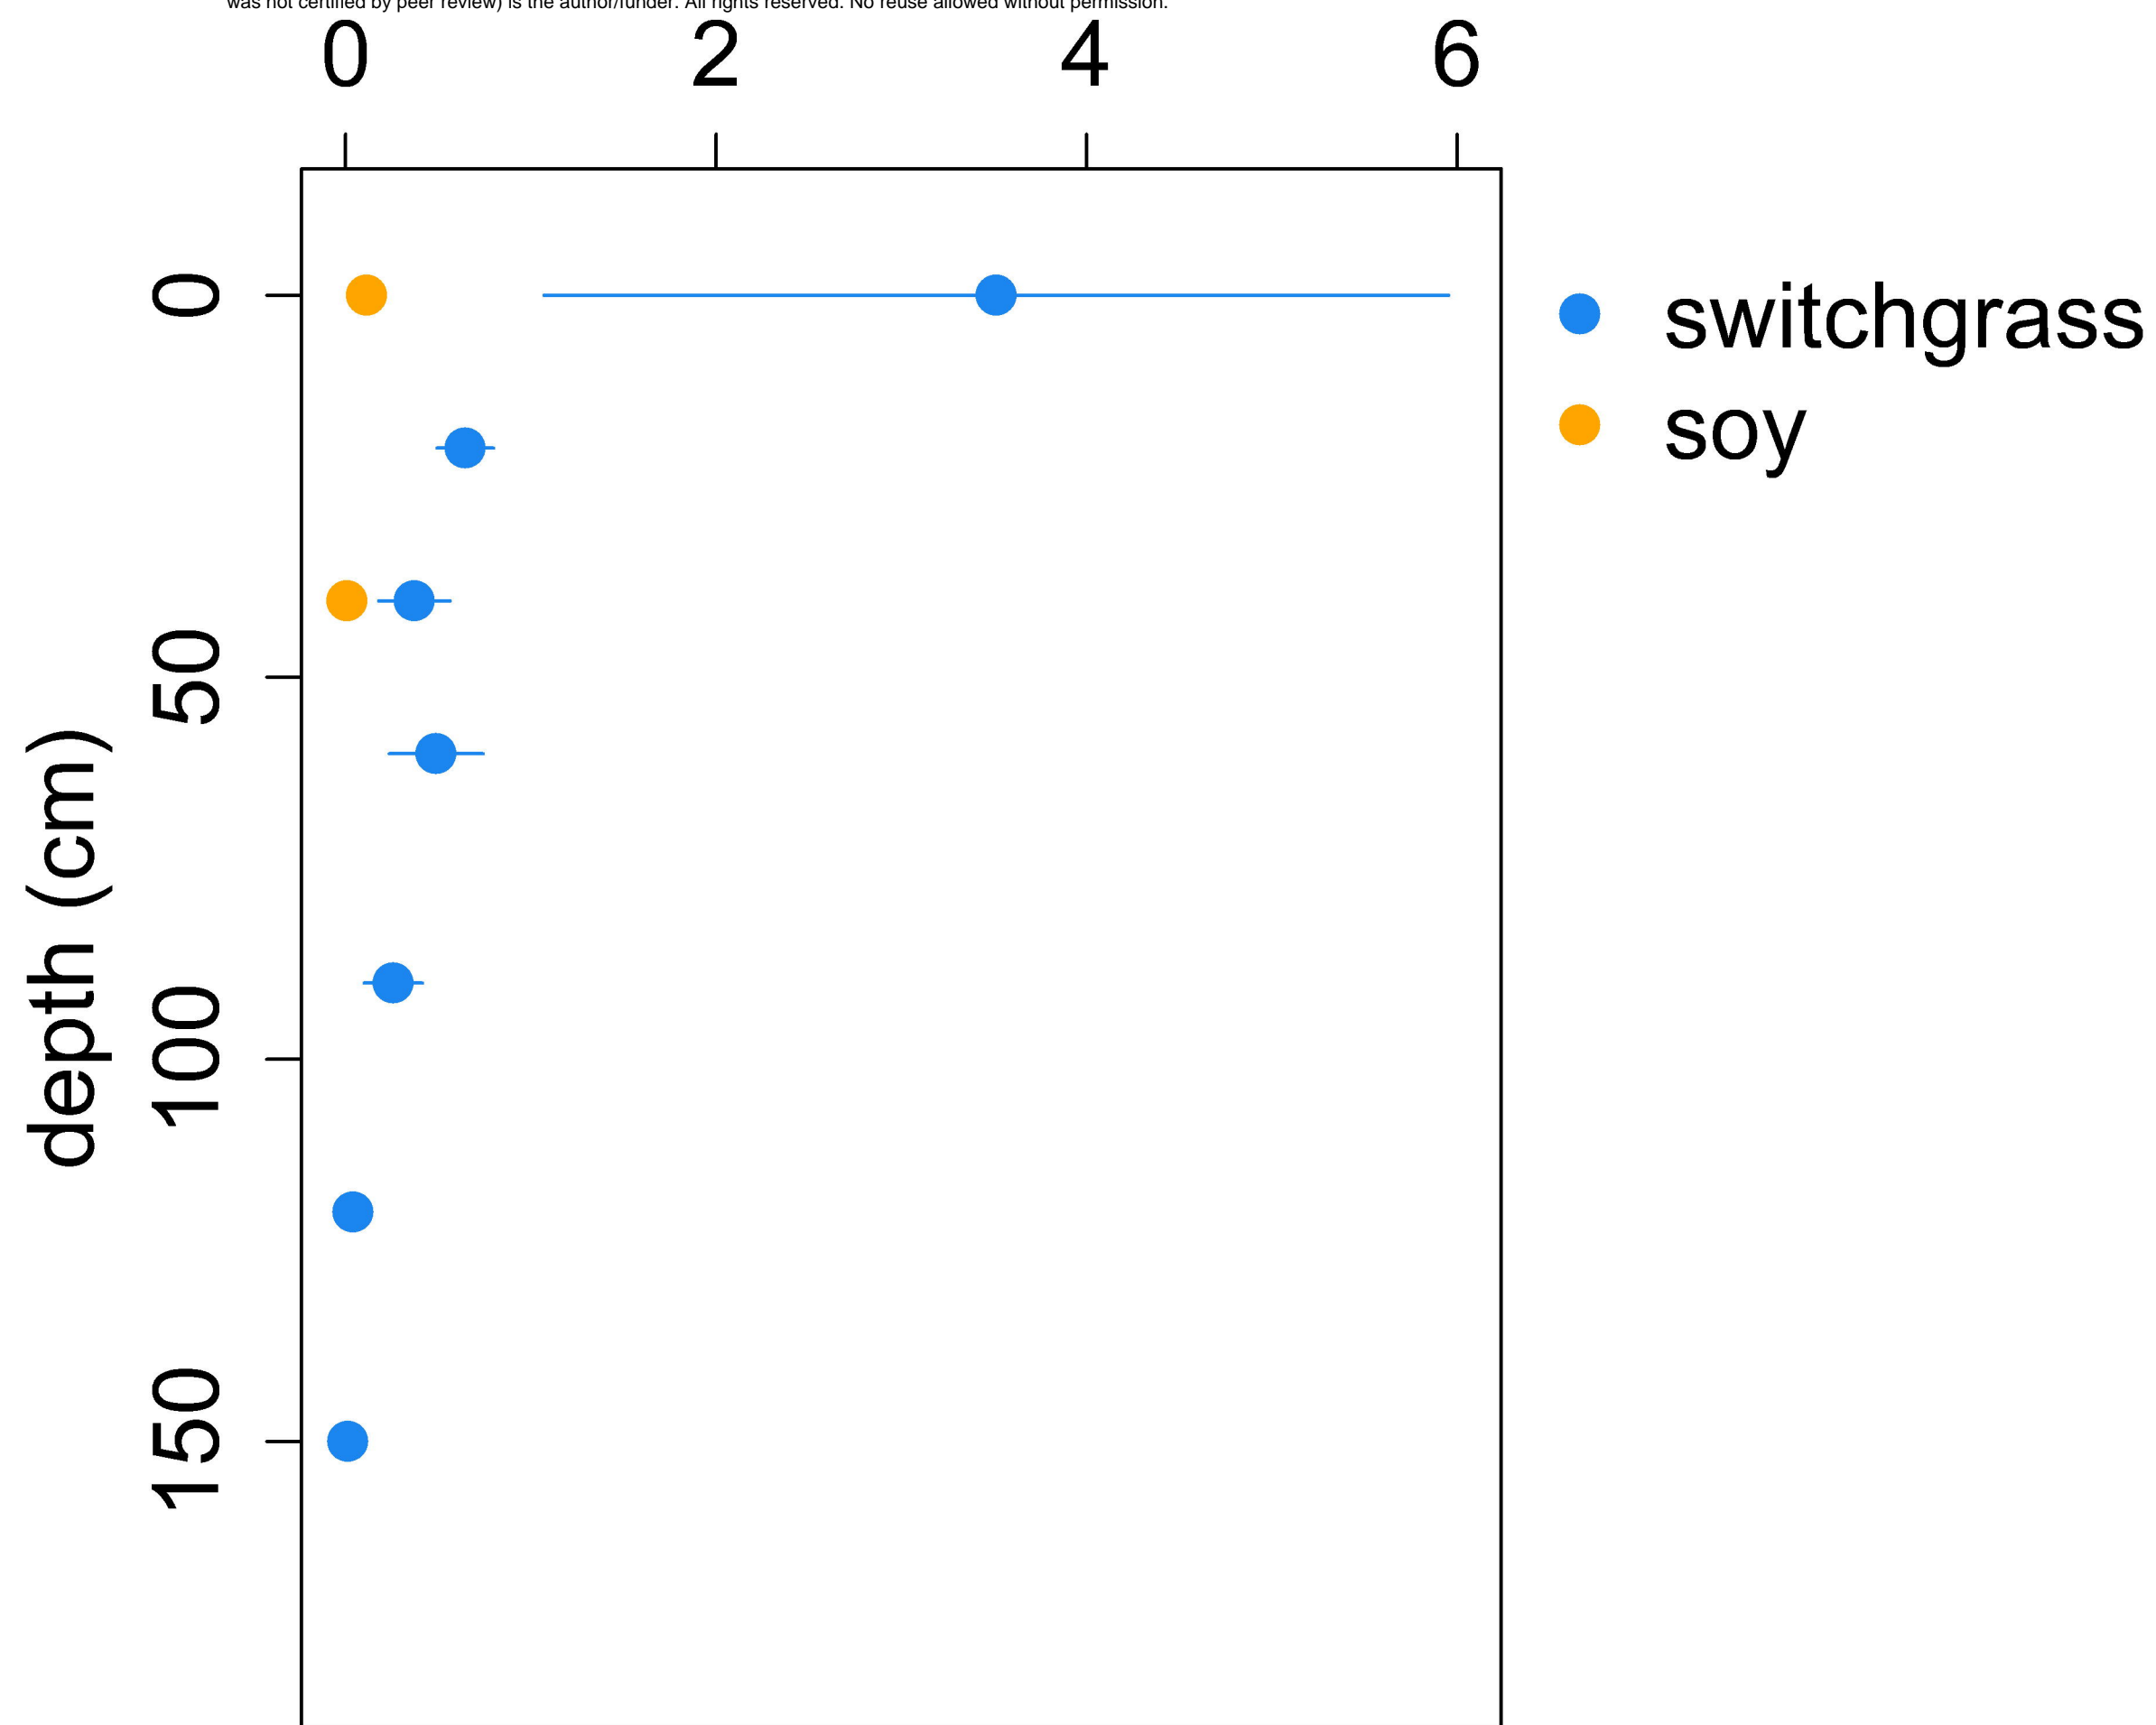

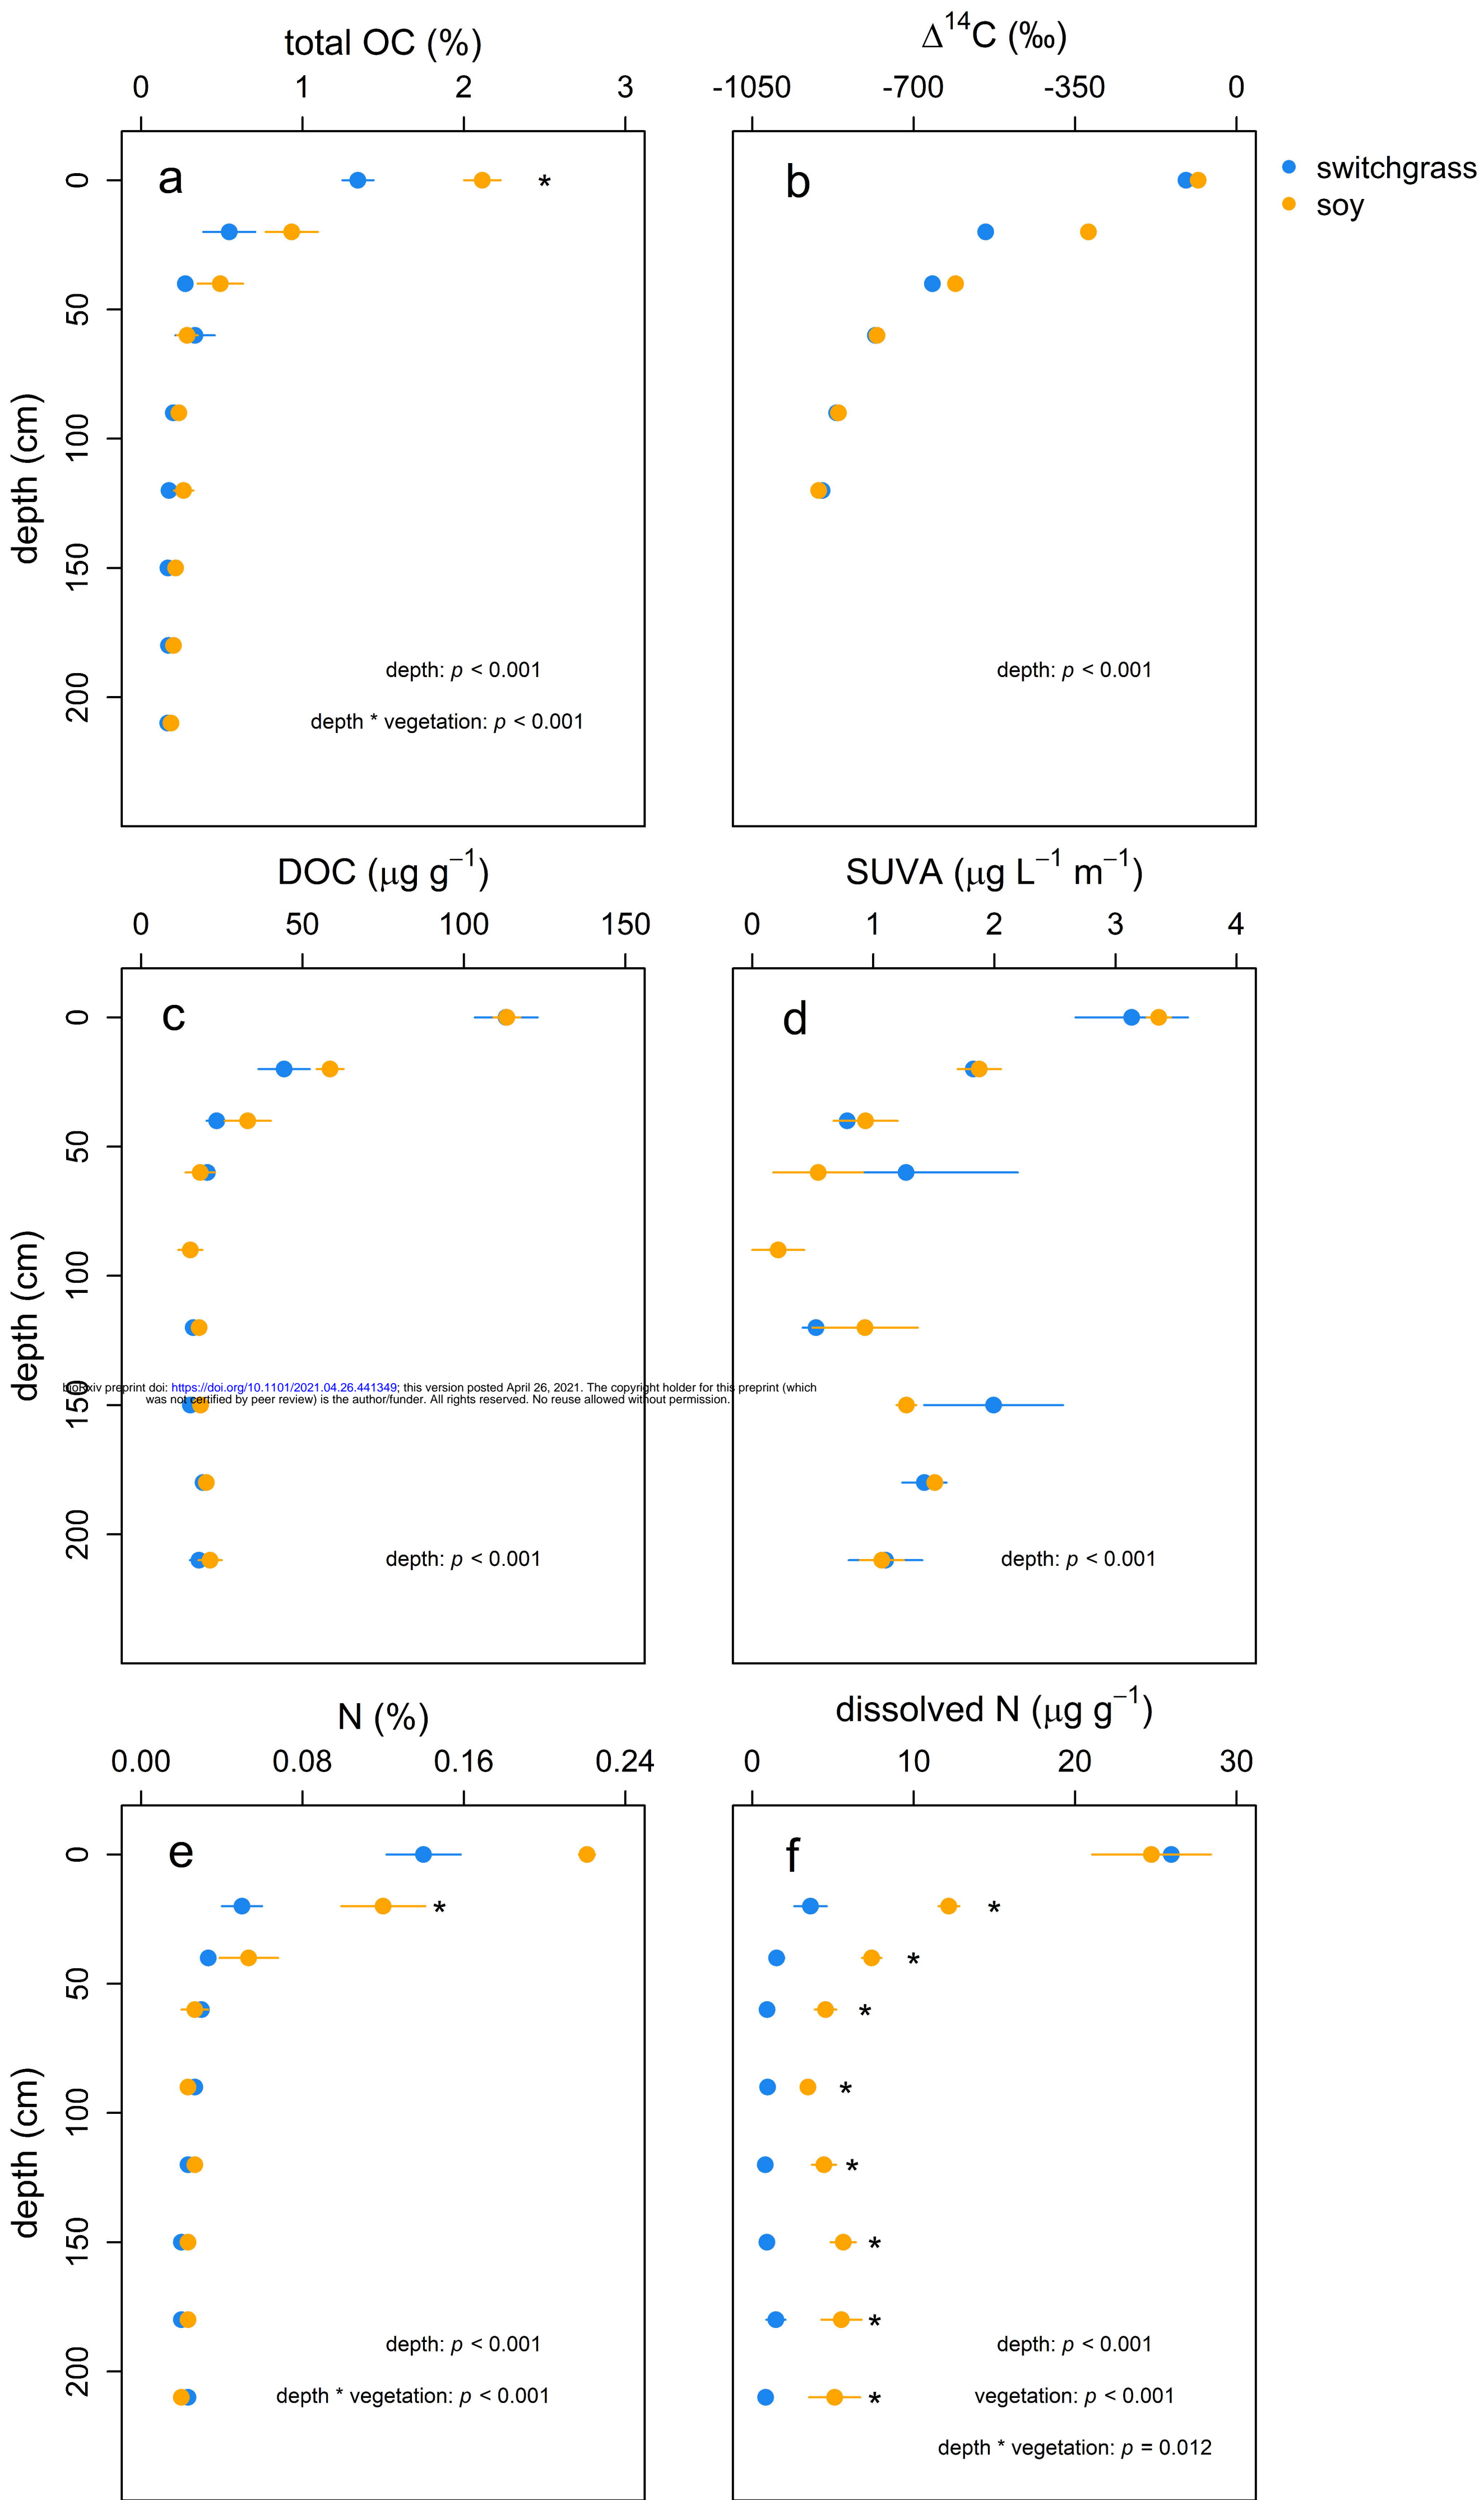

CO<sub>2</sub> flux (μg C-CO<sub>2</sub> g<sup>-1</sup> h<sup>-1</sup>)

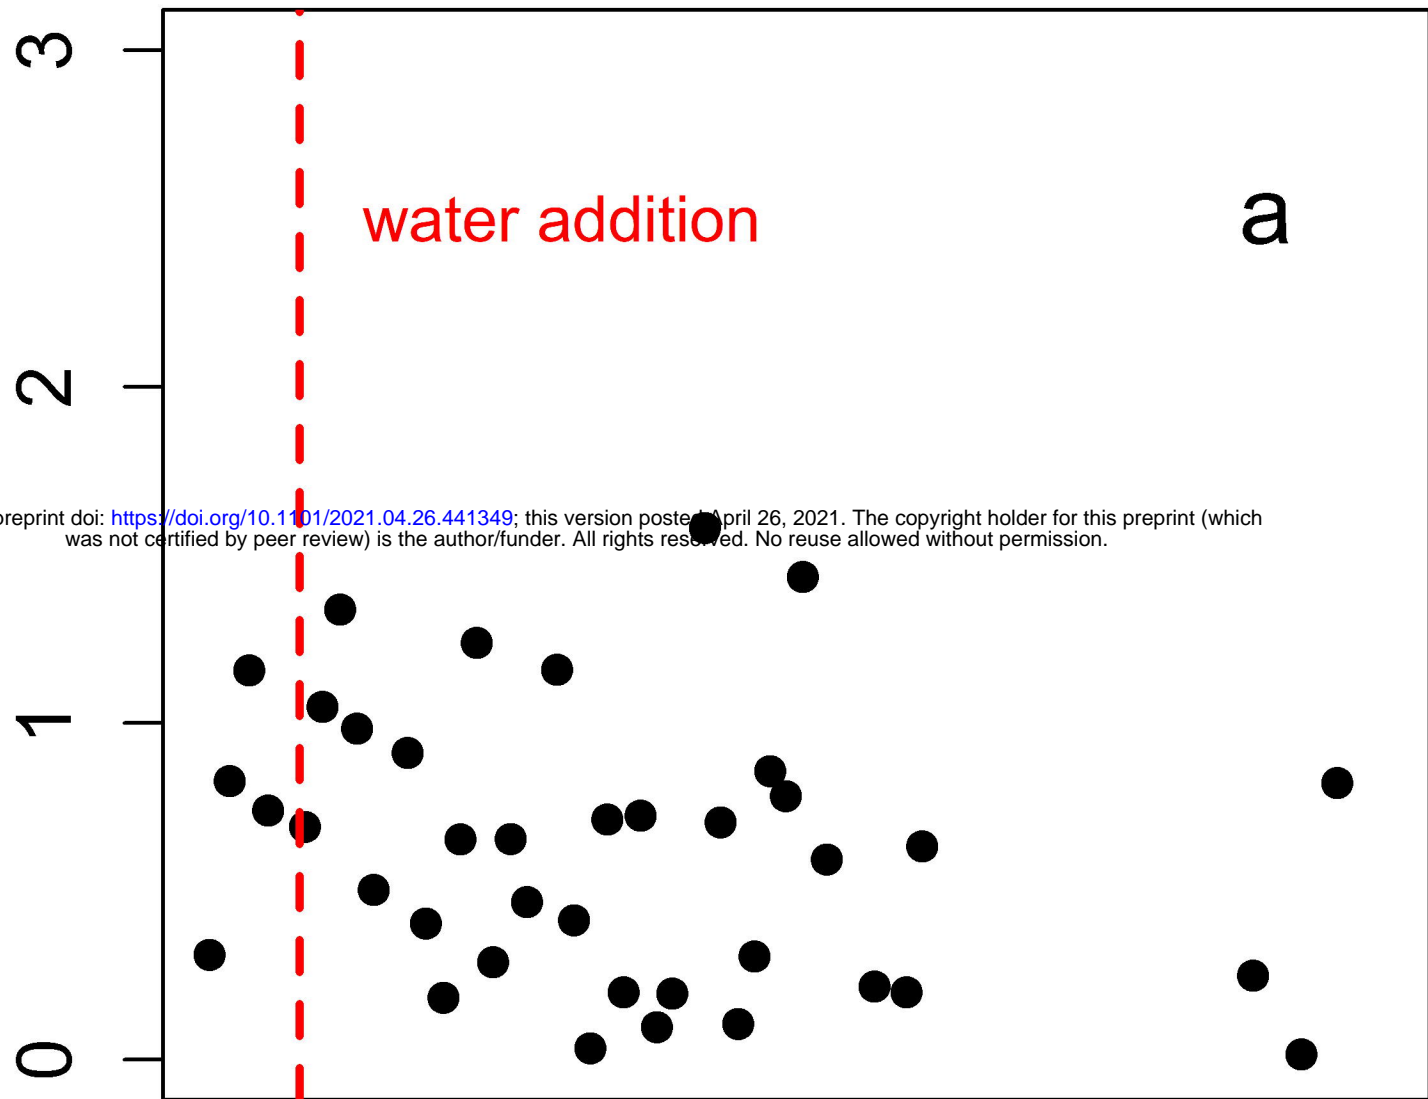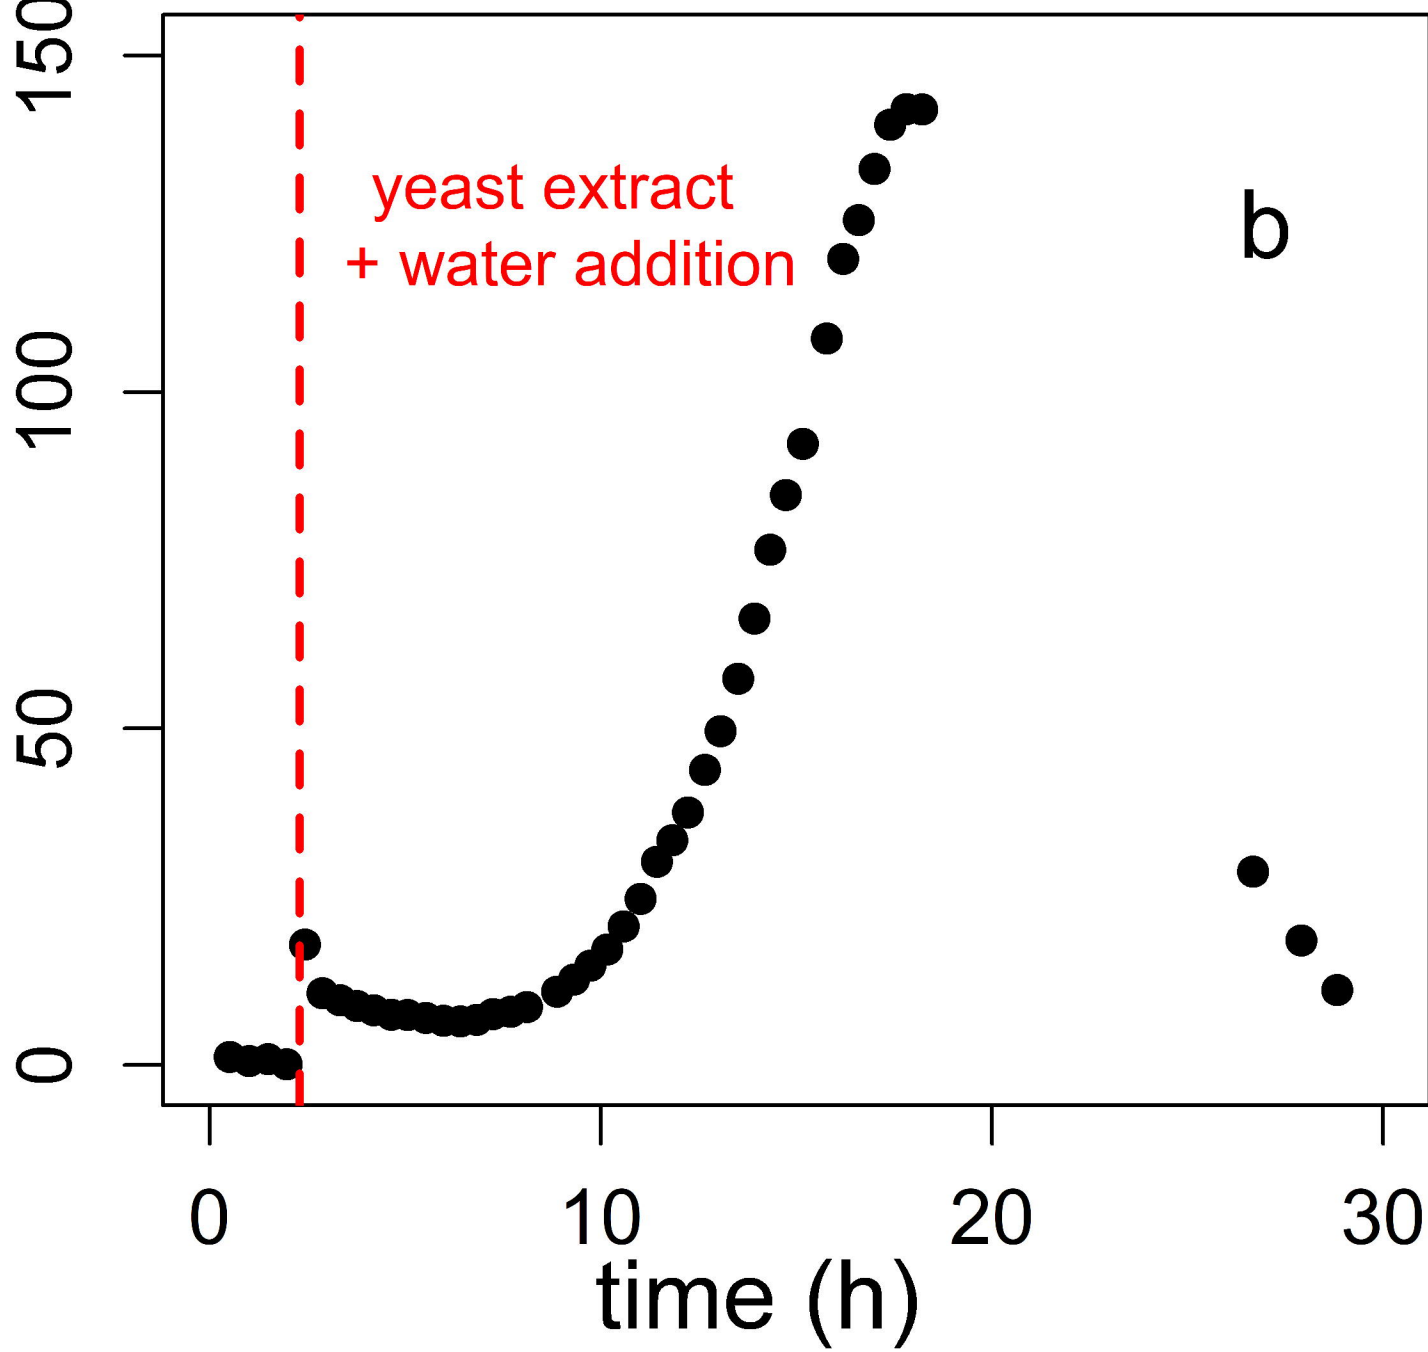

Source: http://biorxiv.org/content/10.1101/2021.04.26.441349v1.full.pdf
